# Supplementary material for: Deep Learning on Chaos Game Representation for Proteins
Source: bioRxiv or medRxiv preprint supplement (doi:10.1101/575324), 2019-03-12
Supplement: Supplementary file [file media-1.pdf]

# Supplementary Material for Deep Learning on Chaos Game Representation for Proteins

Hannah F. Löchel, Dominic Eger, Theodor Sperlea and Dominik Heider

March 2019

## Abstract

This sections contains the  $\langle \phi, \delta \rangle$  [Armano and Giuliani, 2018] the encoding used by Heider et al. [2011] for all drugs (Figure 1), and within the CGR encoding, for all configurations used in this study (left column Figure 3 to Figure 29). The difference between the average FCGR of positive and negative sequences in the datasets are shown in the middle column of Figure 3 to Figure 29, and the significance of the differences in  $\log(p)$  values as calculated using a Bonferroni-corrected t-test in the right column. Blue pixels are significantly different between positively and negatively labeled sequences. Gray pixels contain no values or zeros.

## References

- Giuliano Armano and Alessandro Giuliani. A two-tiered 2d visual tool for assessing classifier performance. *Information Sciences*, jun 2018. doi: 10.1016/j.ins.2018.06.052. URL <https://doi.org/10.1016%2Fj.ins.2018.06.052>.
- Dominik Heider, Jens Verheyen, and Daniel Hoffmann. Machine learning on normalized protein sequences. *BMC research notes*, 4(1):94, 2011.
- Dominik Heider and Daniel Hoffmann. Interpol: An r package for preprocessing of protein sequences. *BioData mining*, 4(1):16, 2011.

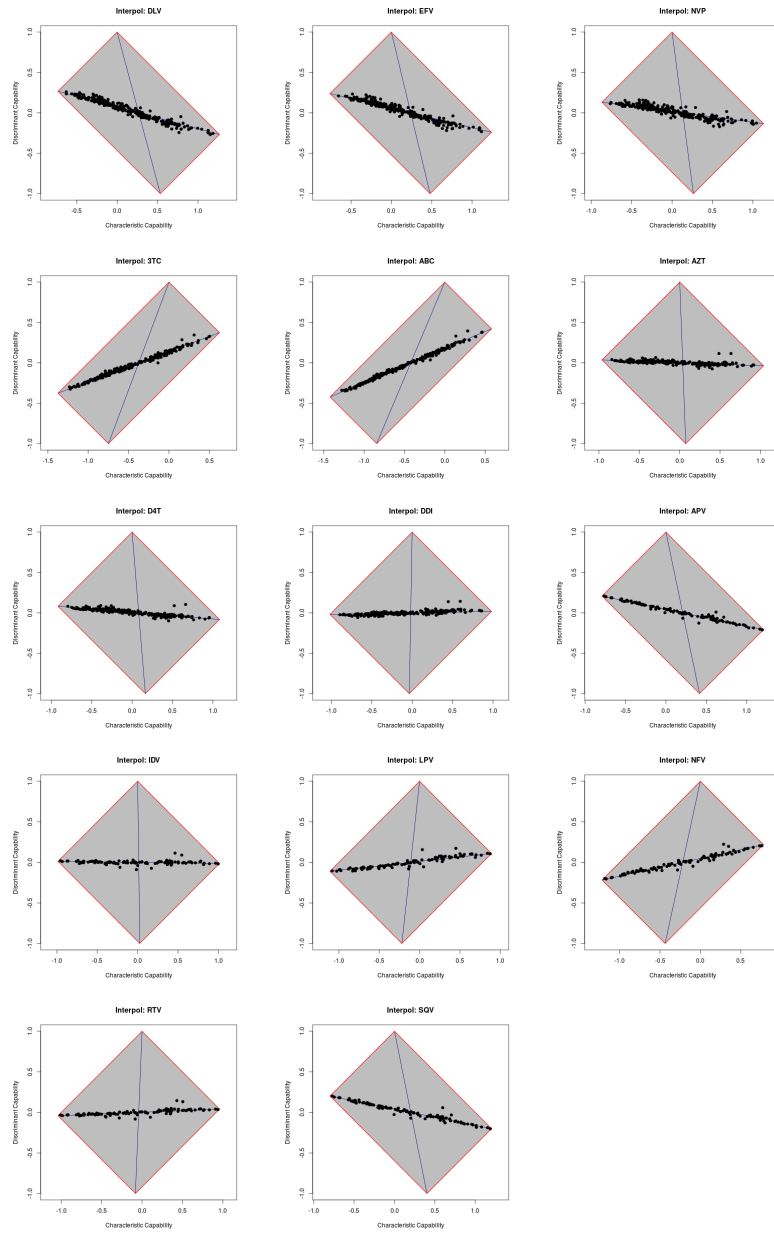

Figure 1:  $\langle \phi, \delta \rangle$  diagrams, calculated using the R package Interpol [Heider and Hoffmann, 2011]

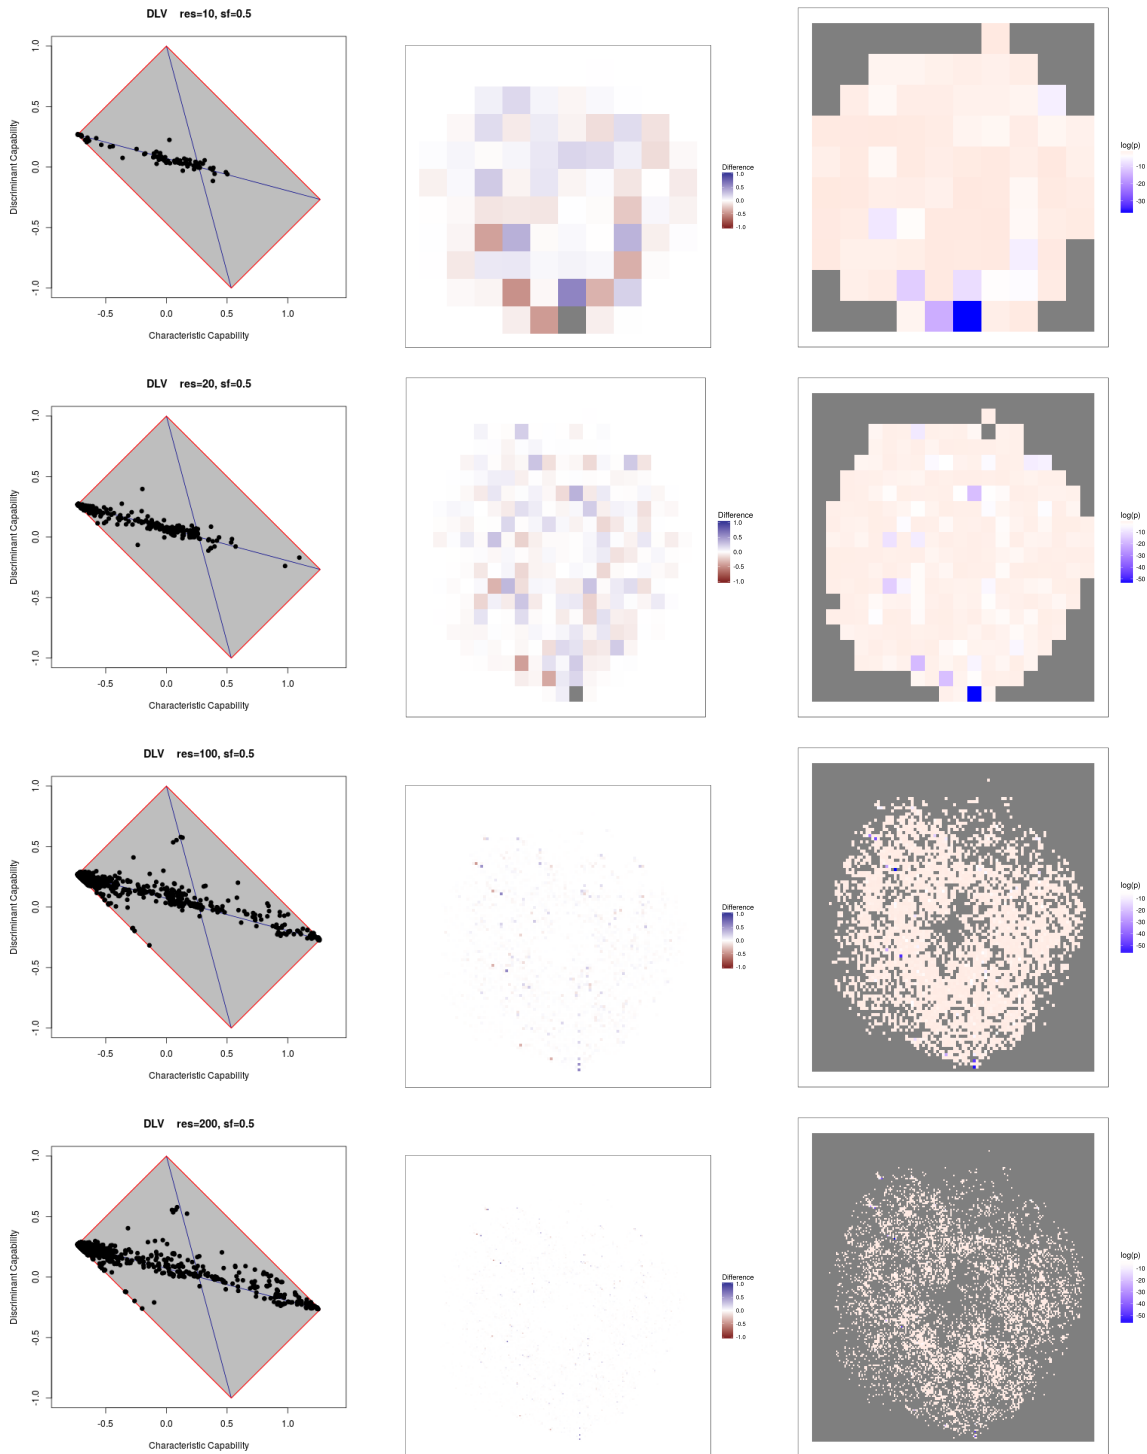

Figure 2: DLV,  $sf=0.5$

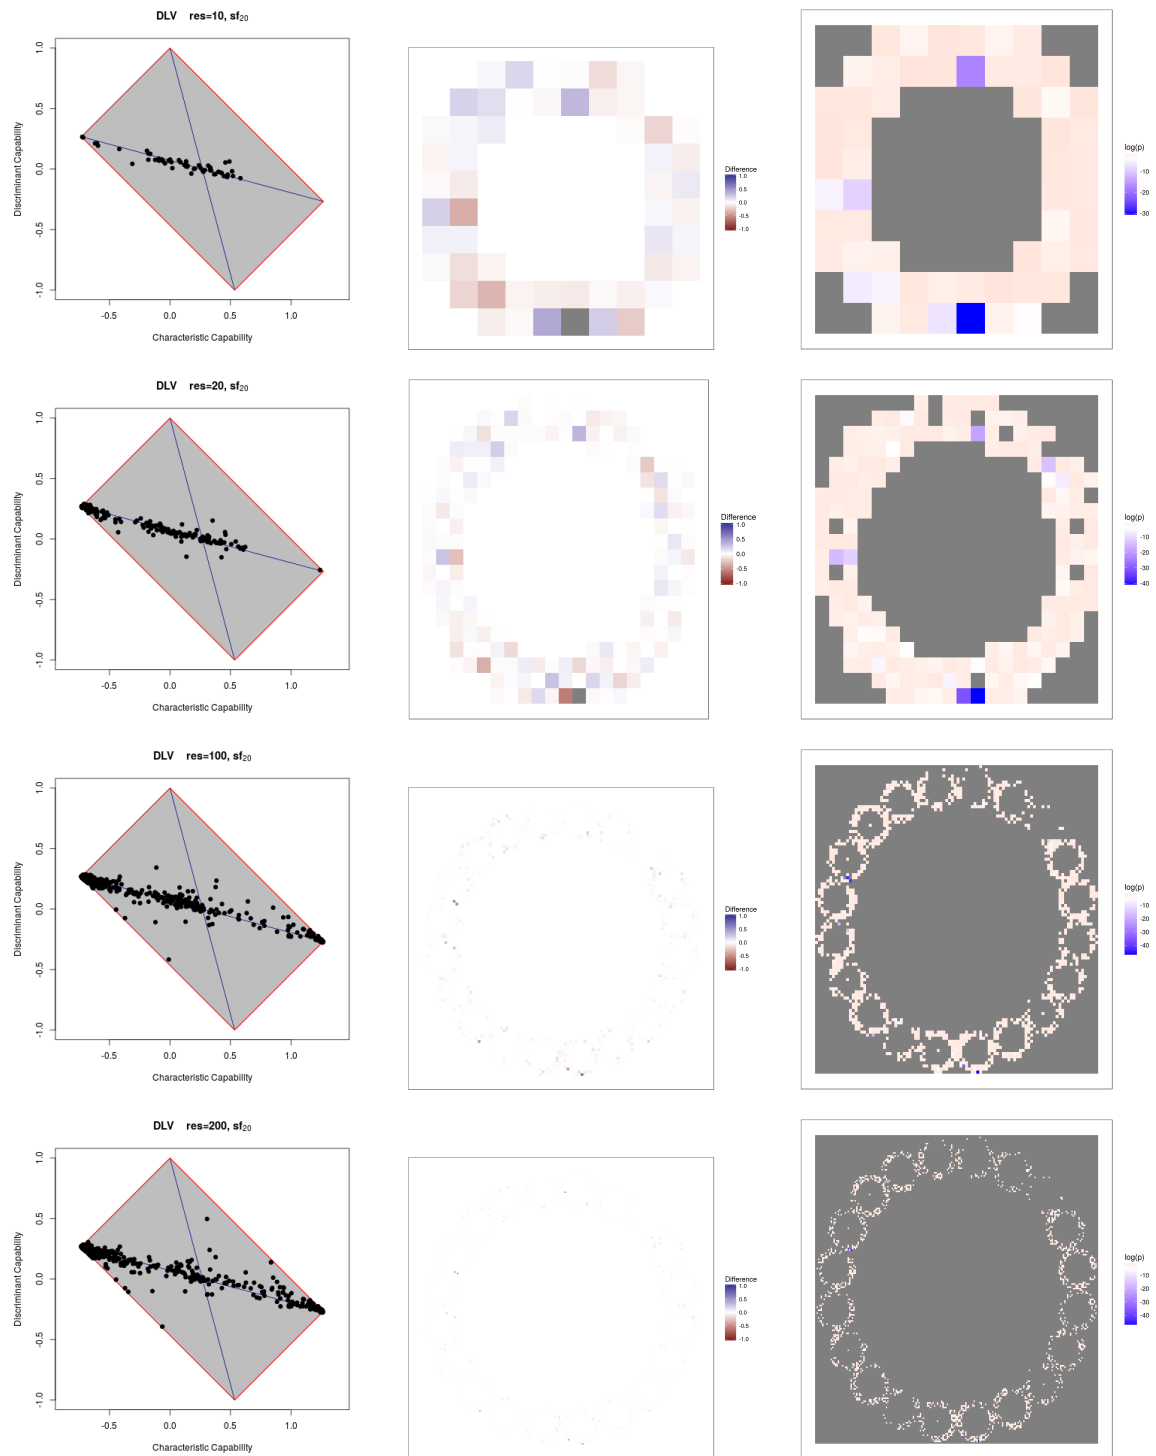

Figure 3: DLV,  $sf_{20}$

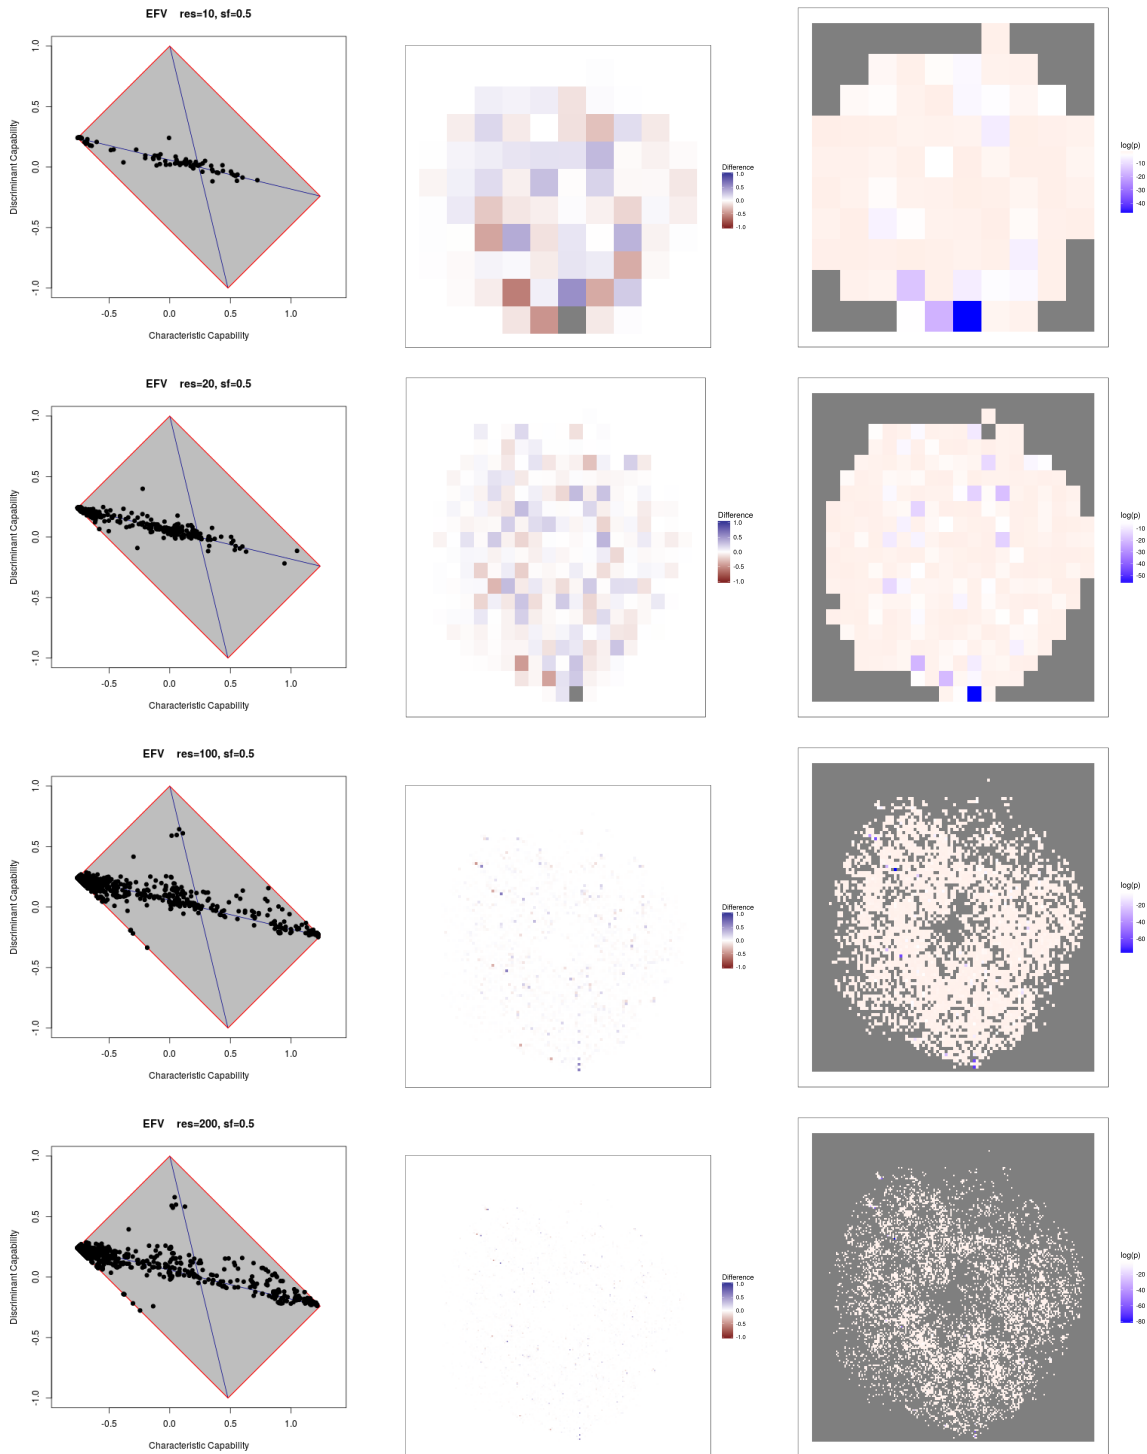

Figure 4: EFV, sf=0.5

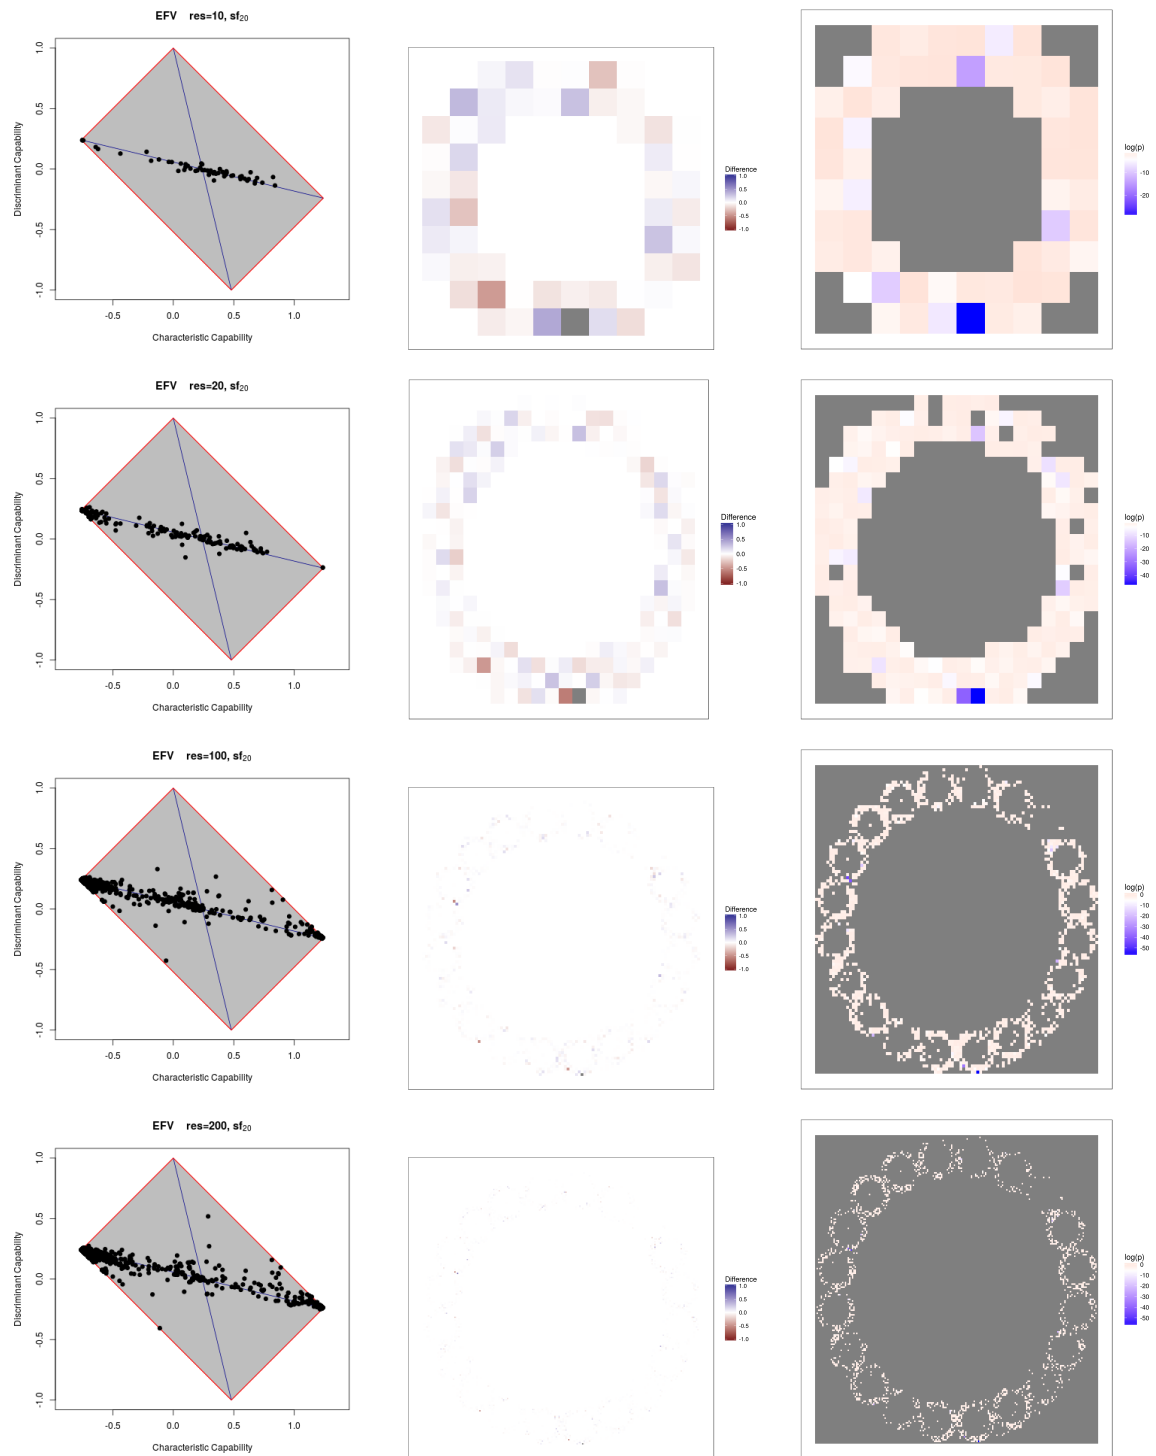

Figure 5: EFV,  $sf_{20}$

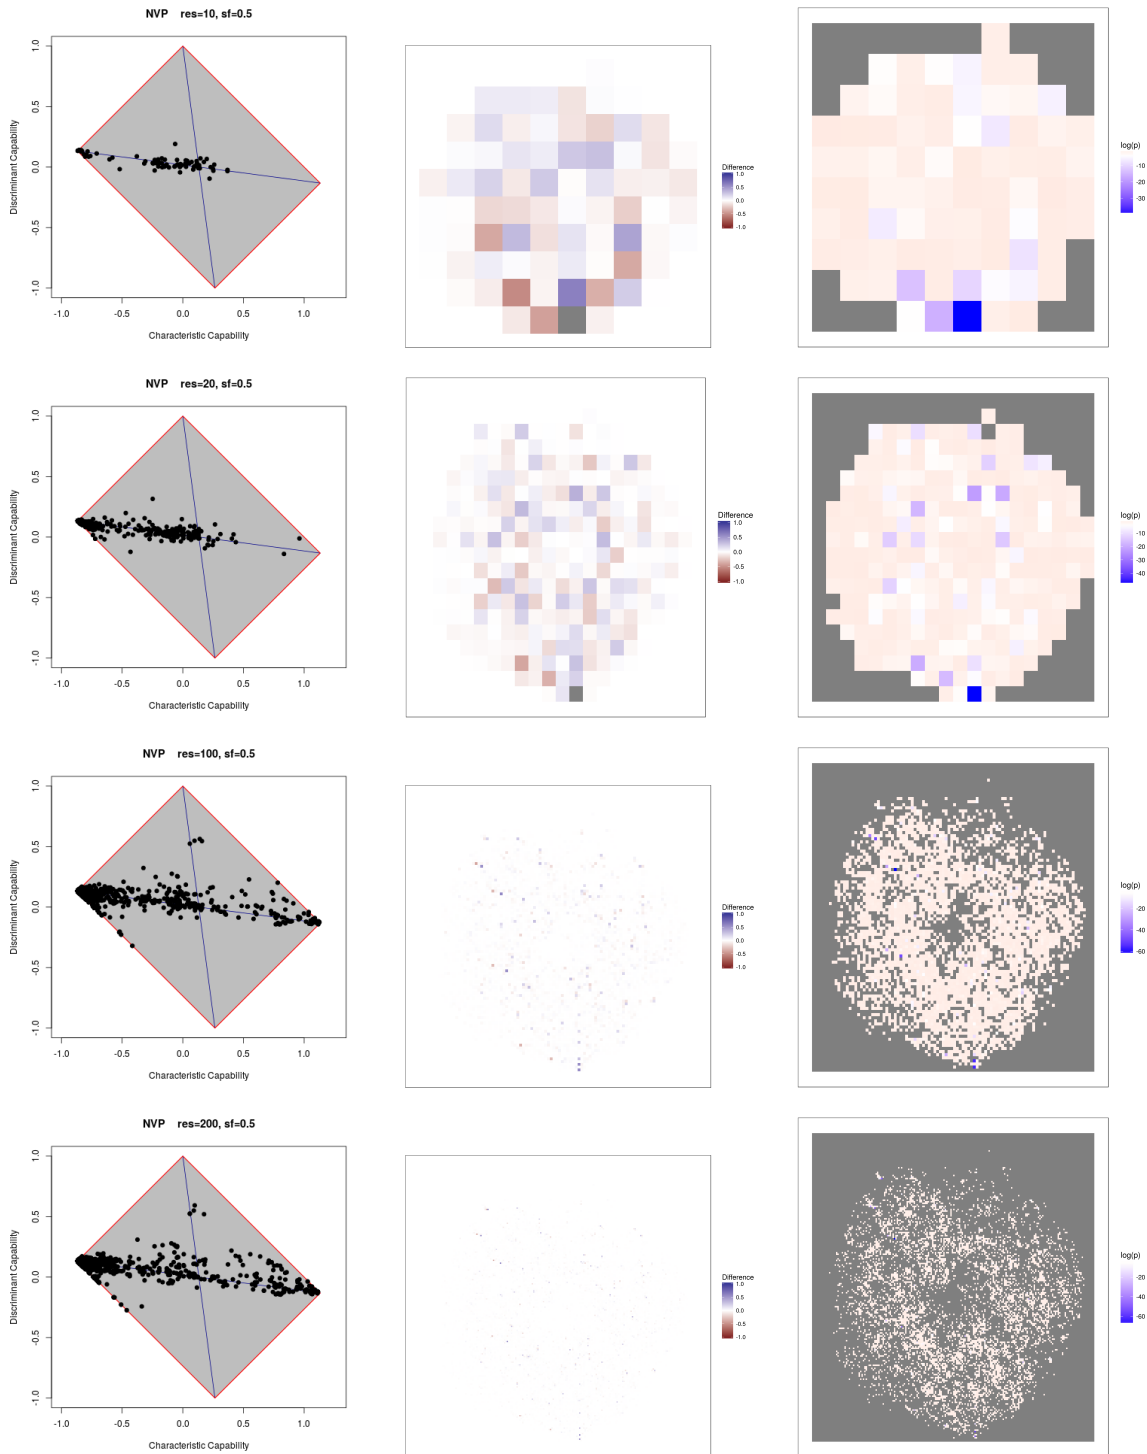

Figure 6: NVP, sf=0.5

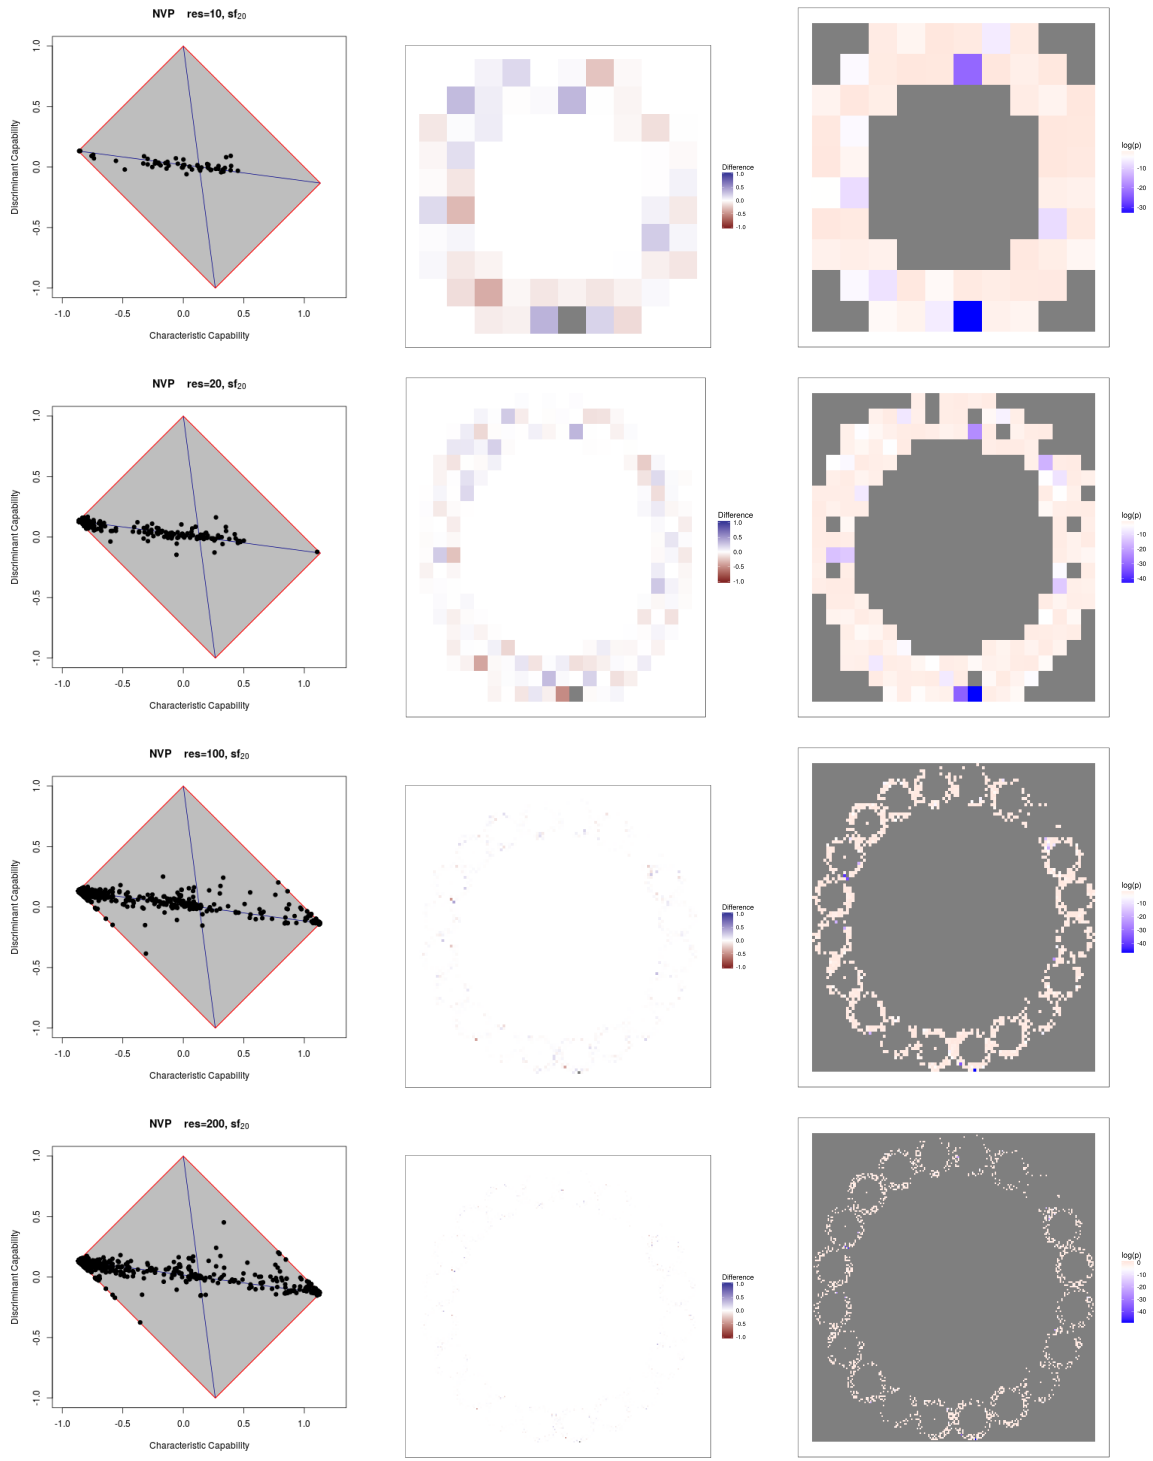

Figure 7: NFV,  $sf_{20}$



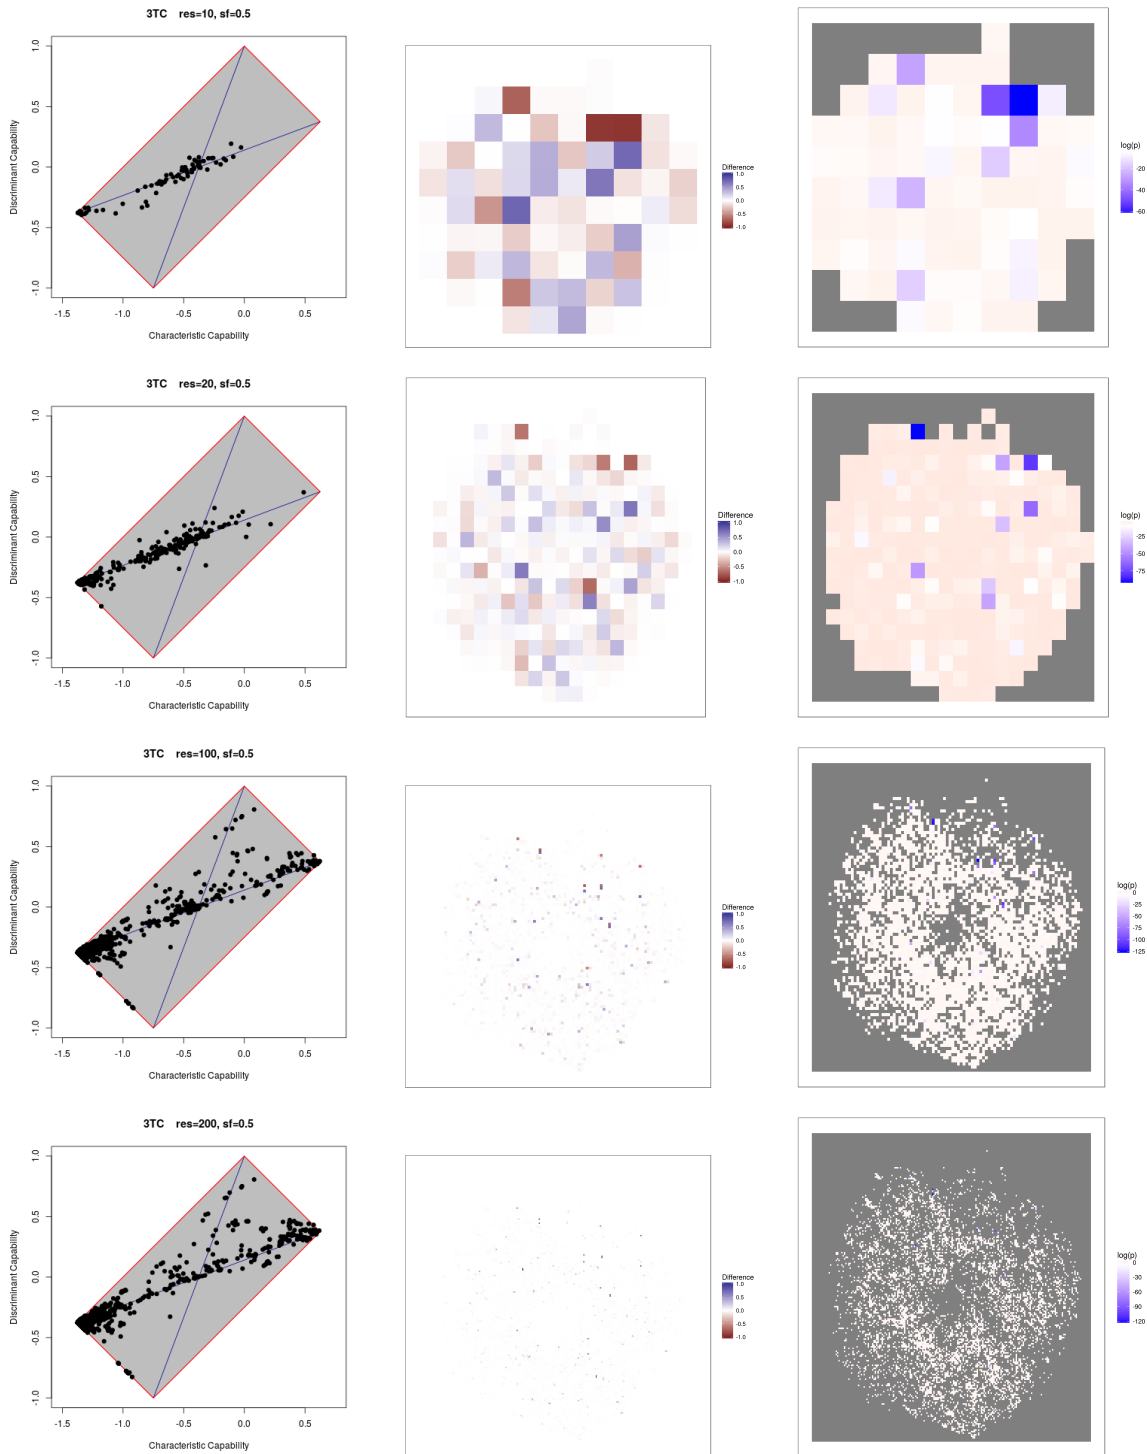

Figure 8: 3TC, sf=0.5

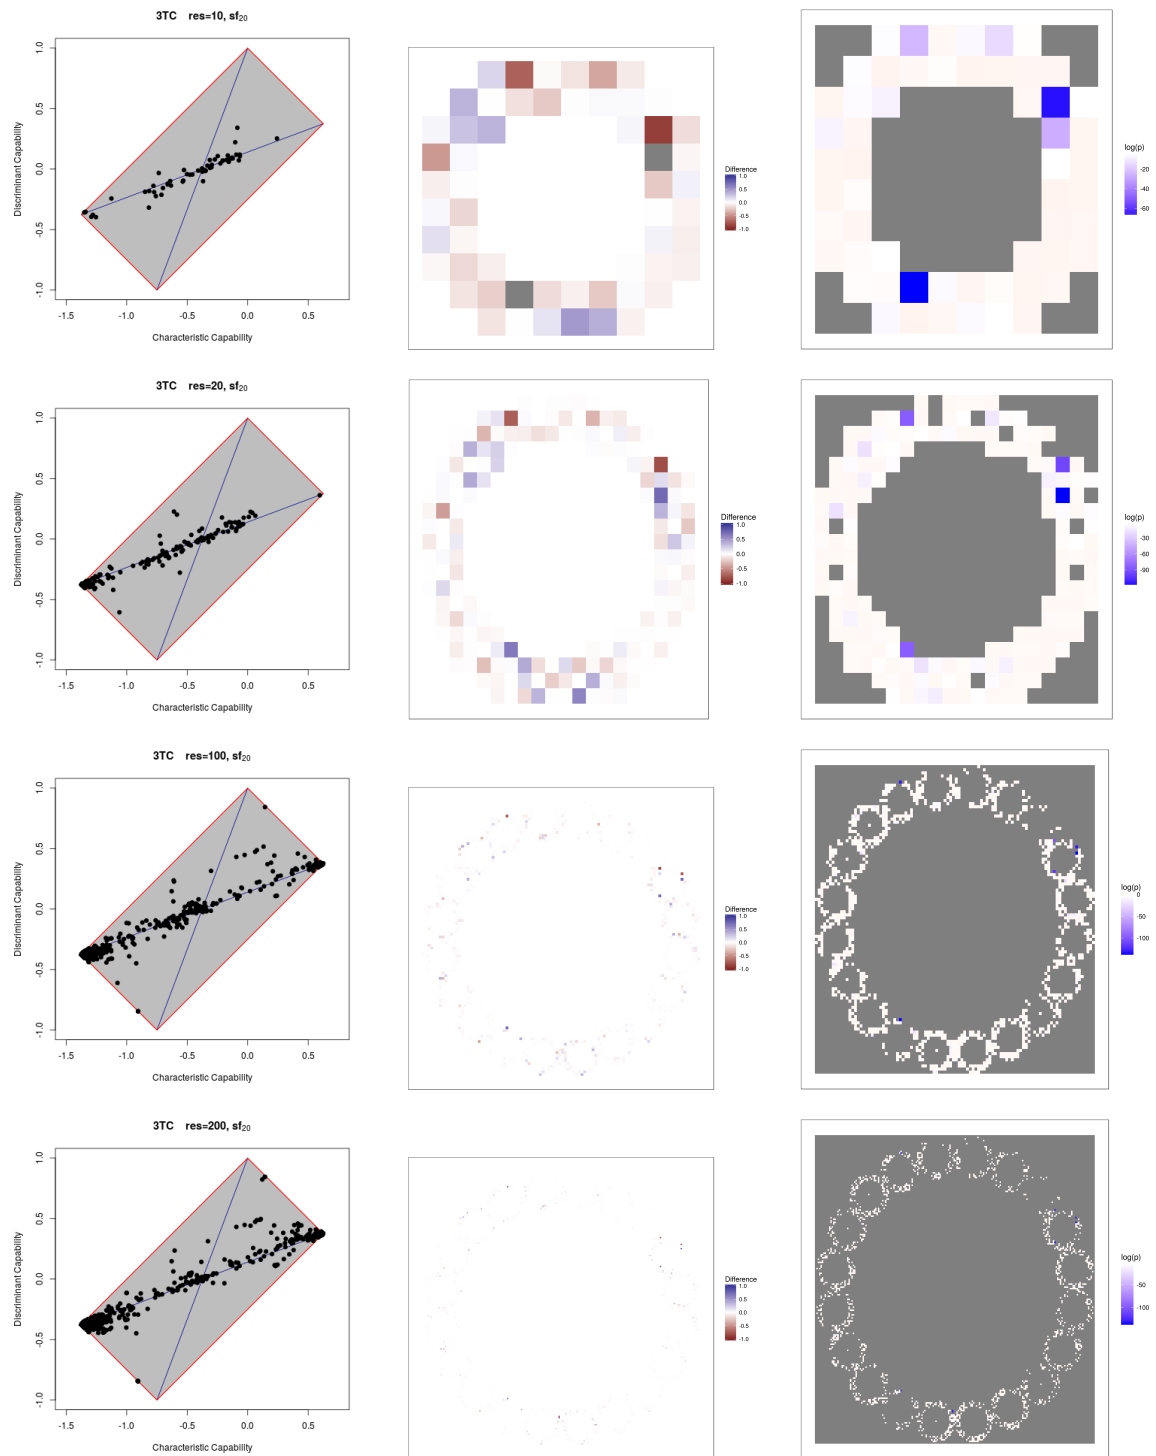

Figure 9: 3TC,  $sf_{20}$

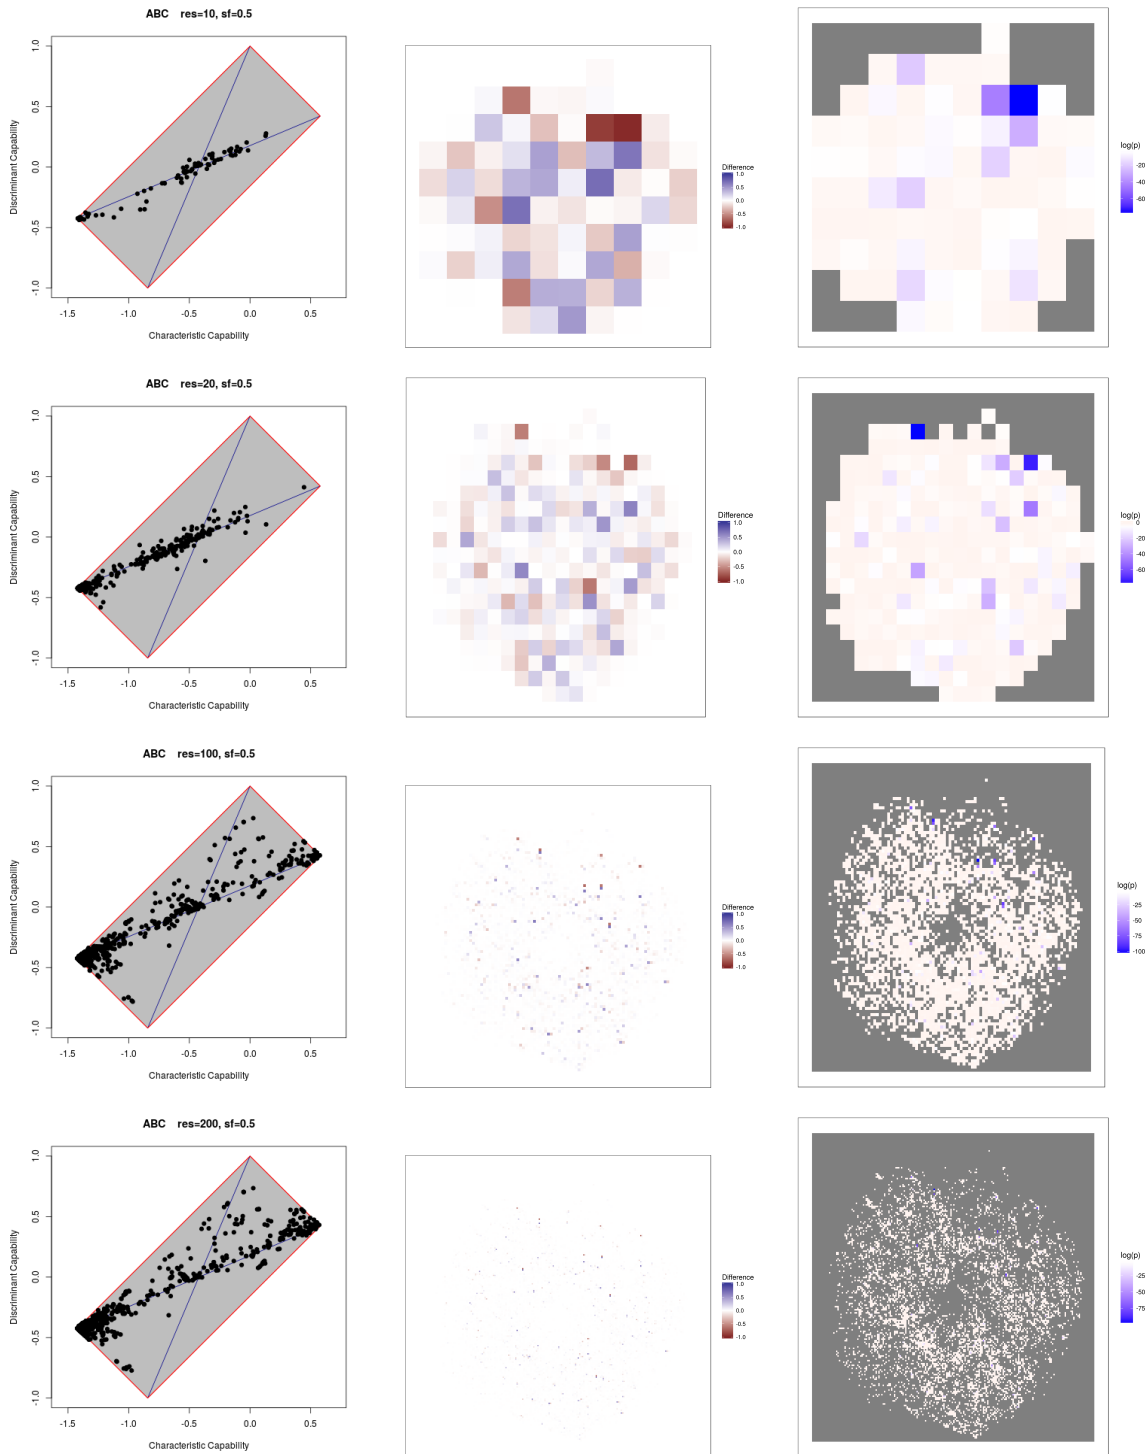

Figure 10: ABC,  $sf=0.5$

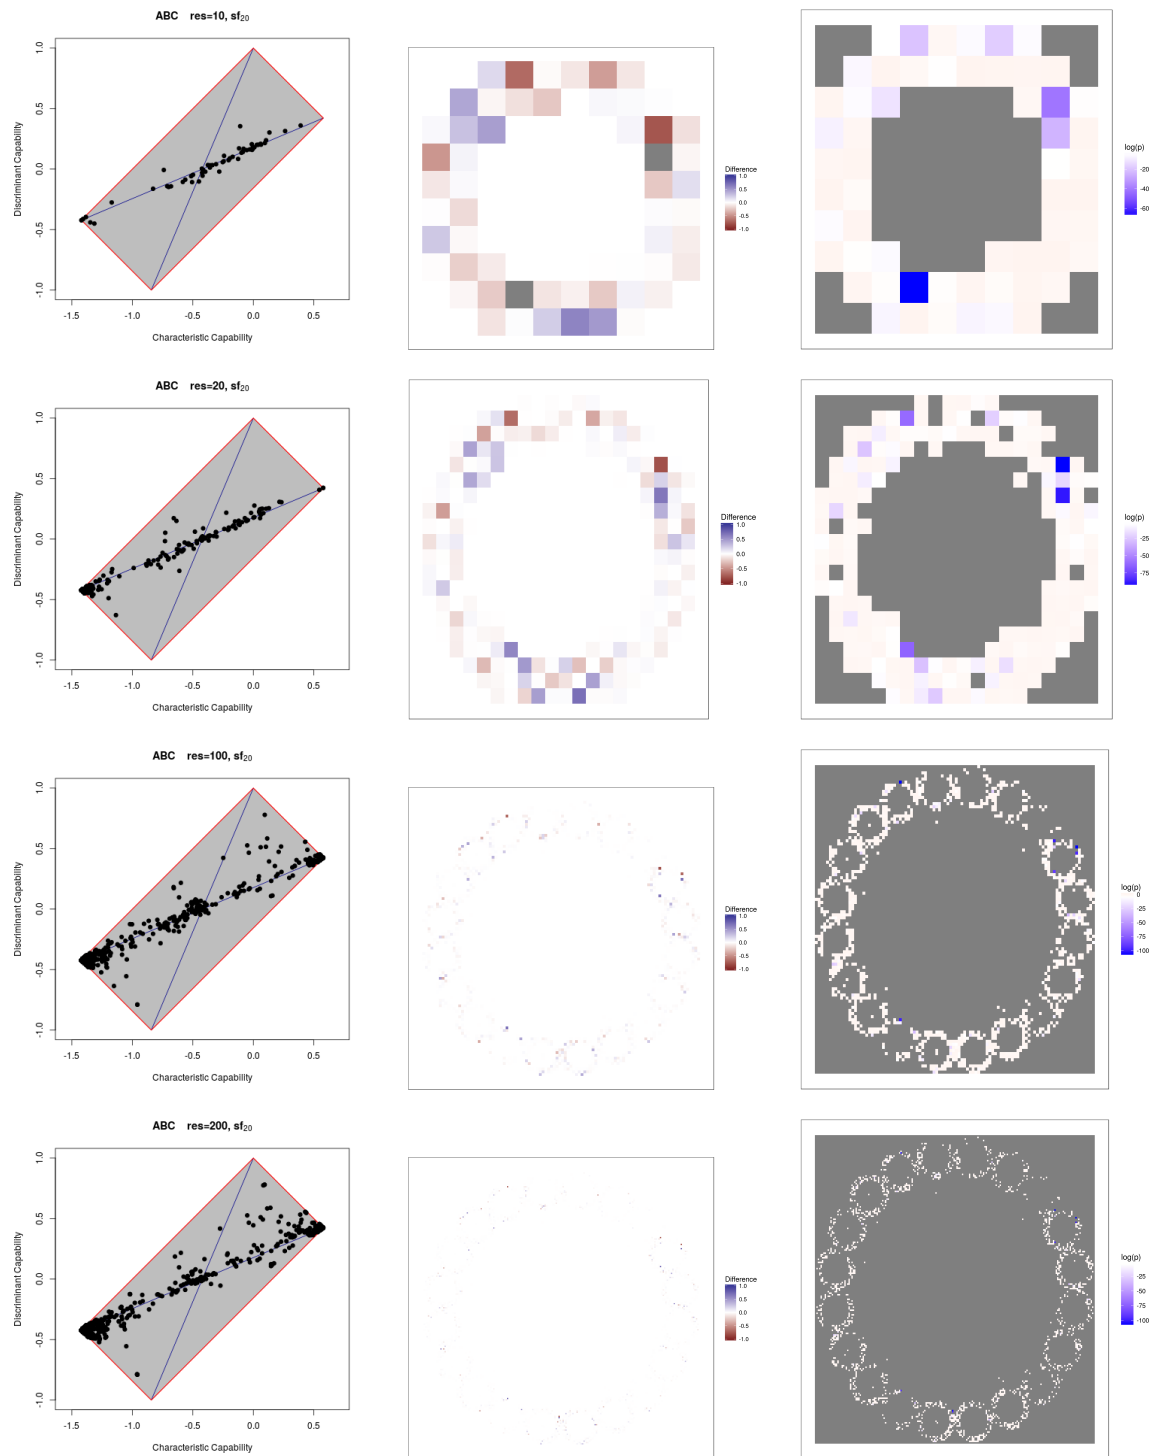

Figure 11: ABC,  $sf_{20}$

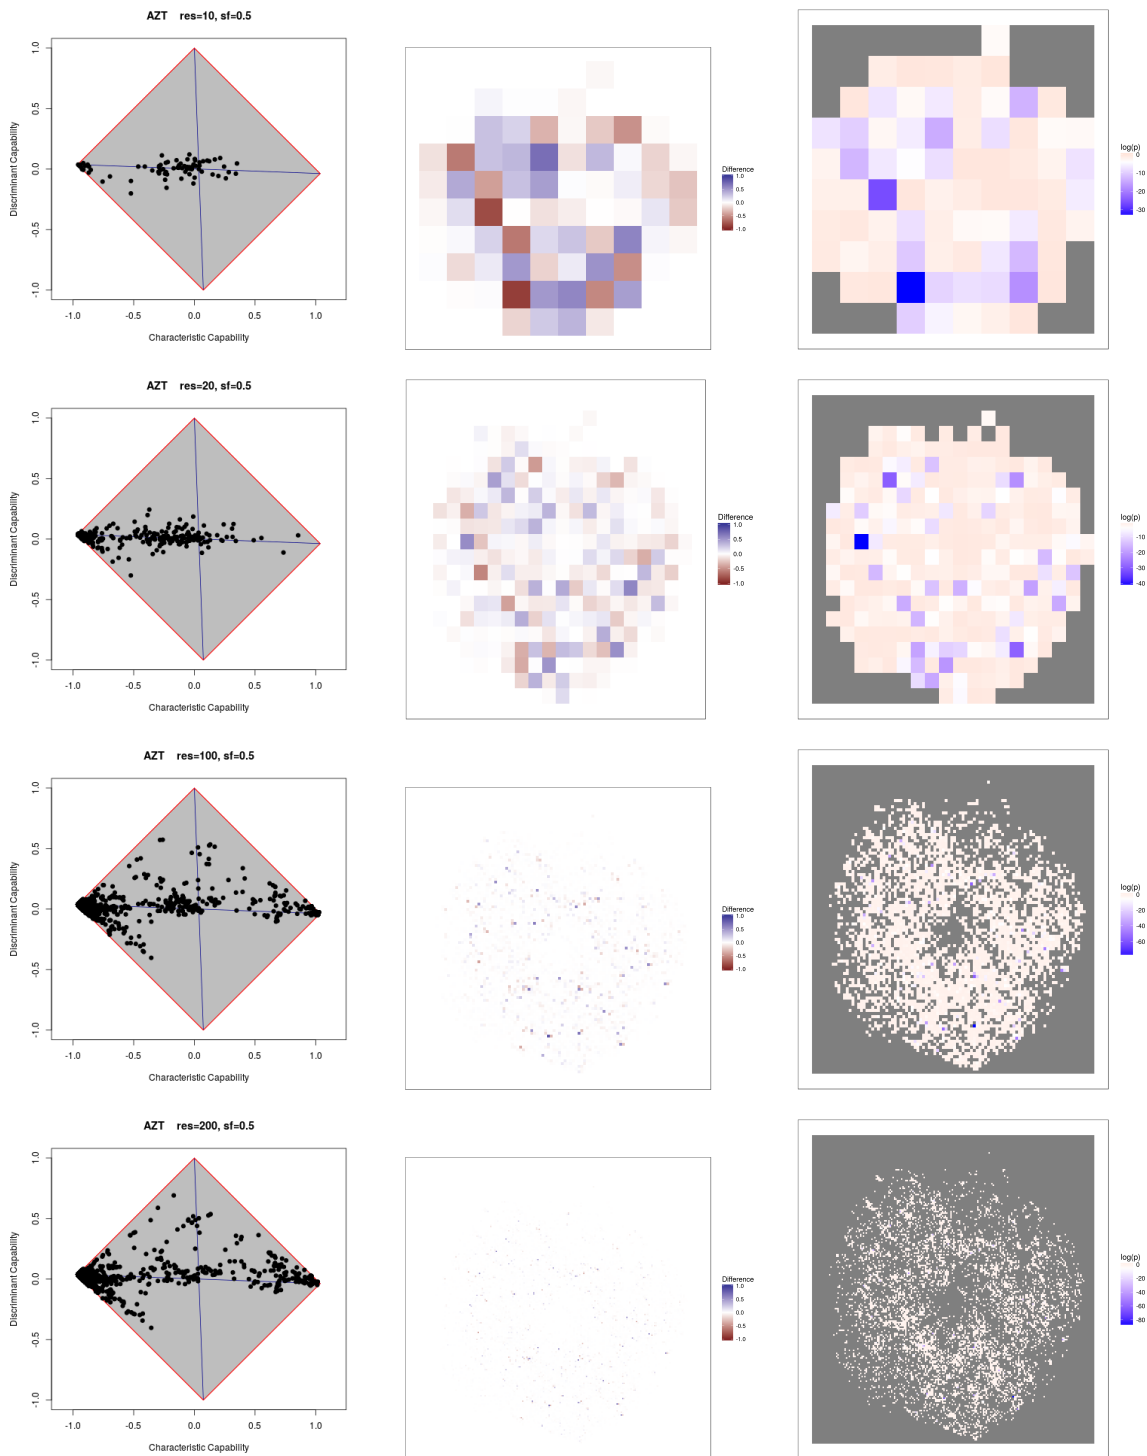

Figure 12: AZT,  $sf=0.5$

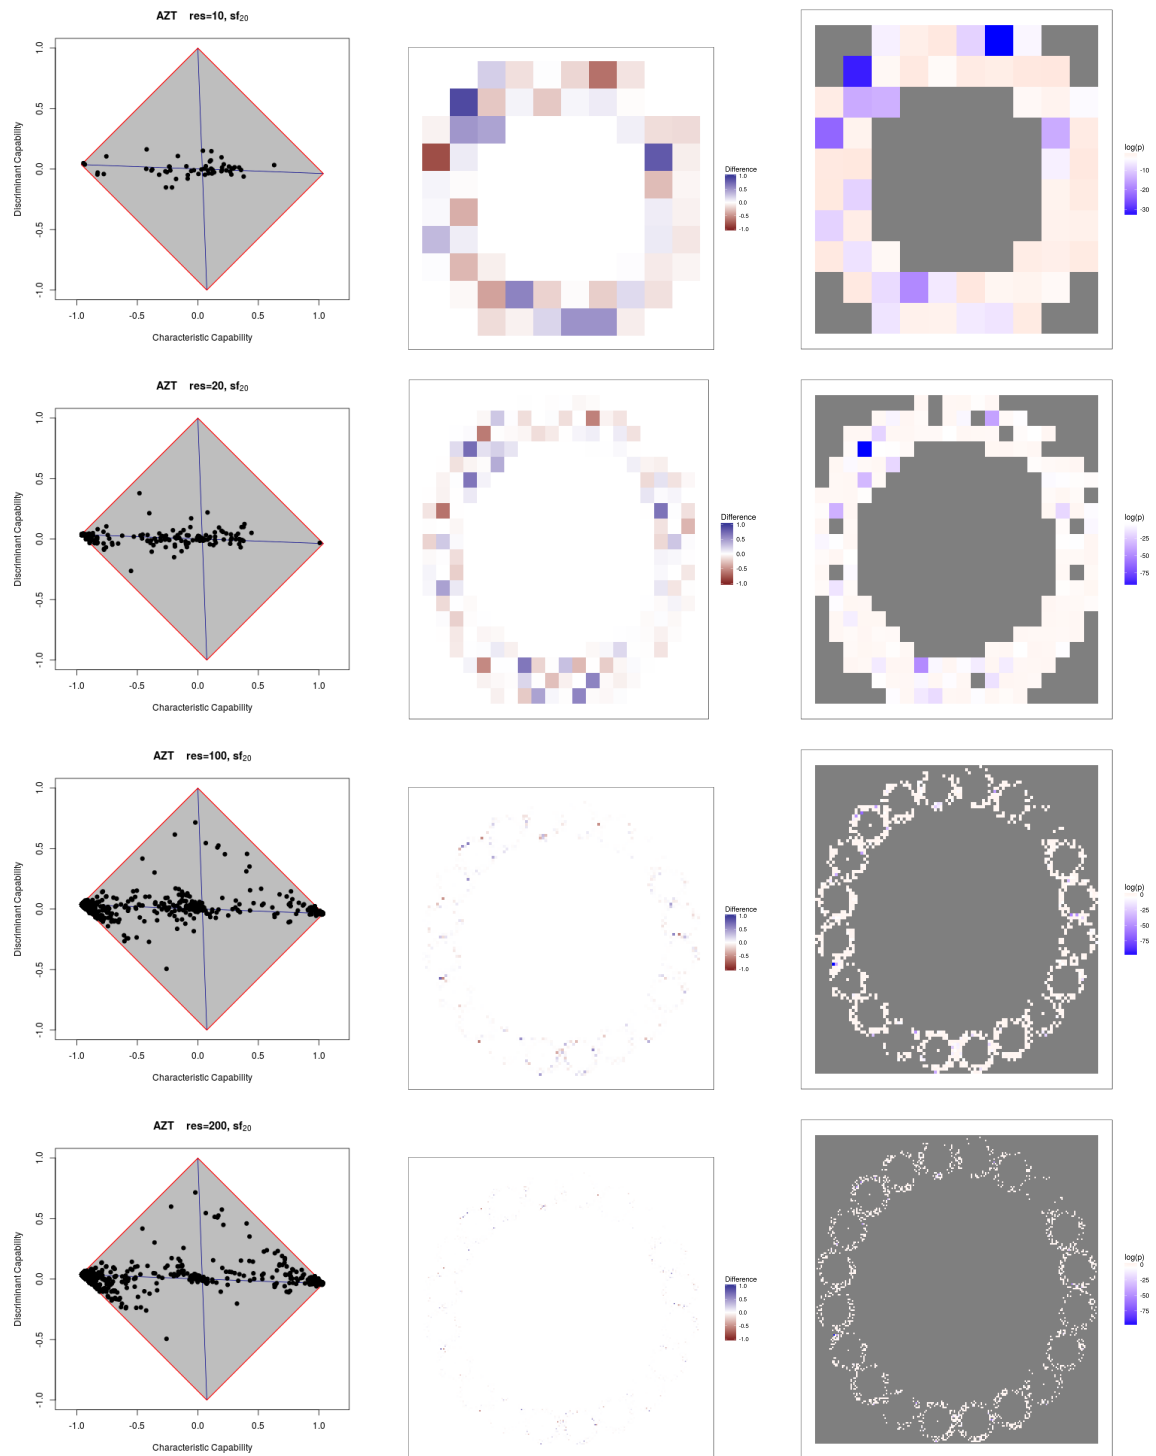

Figure 13: AZT,  $sf_{20}$

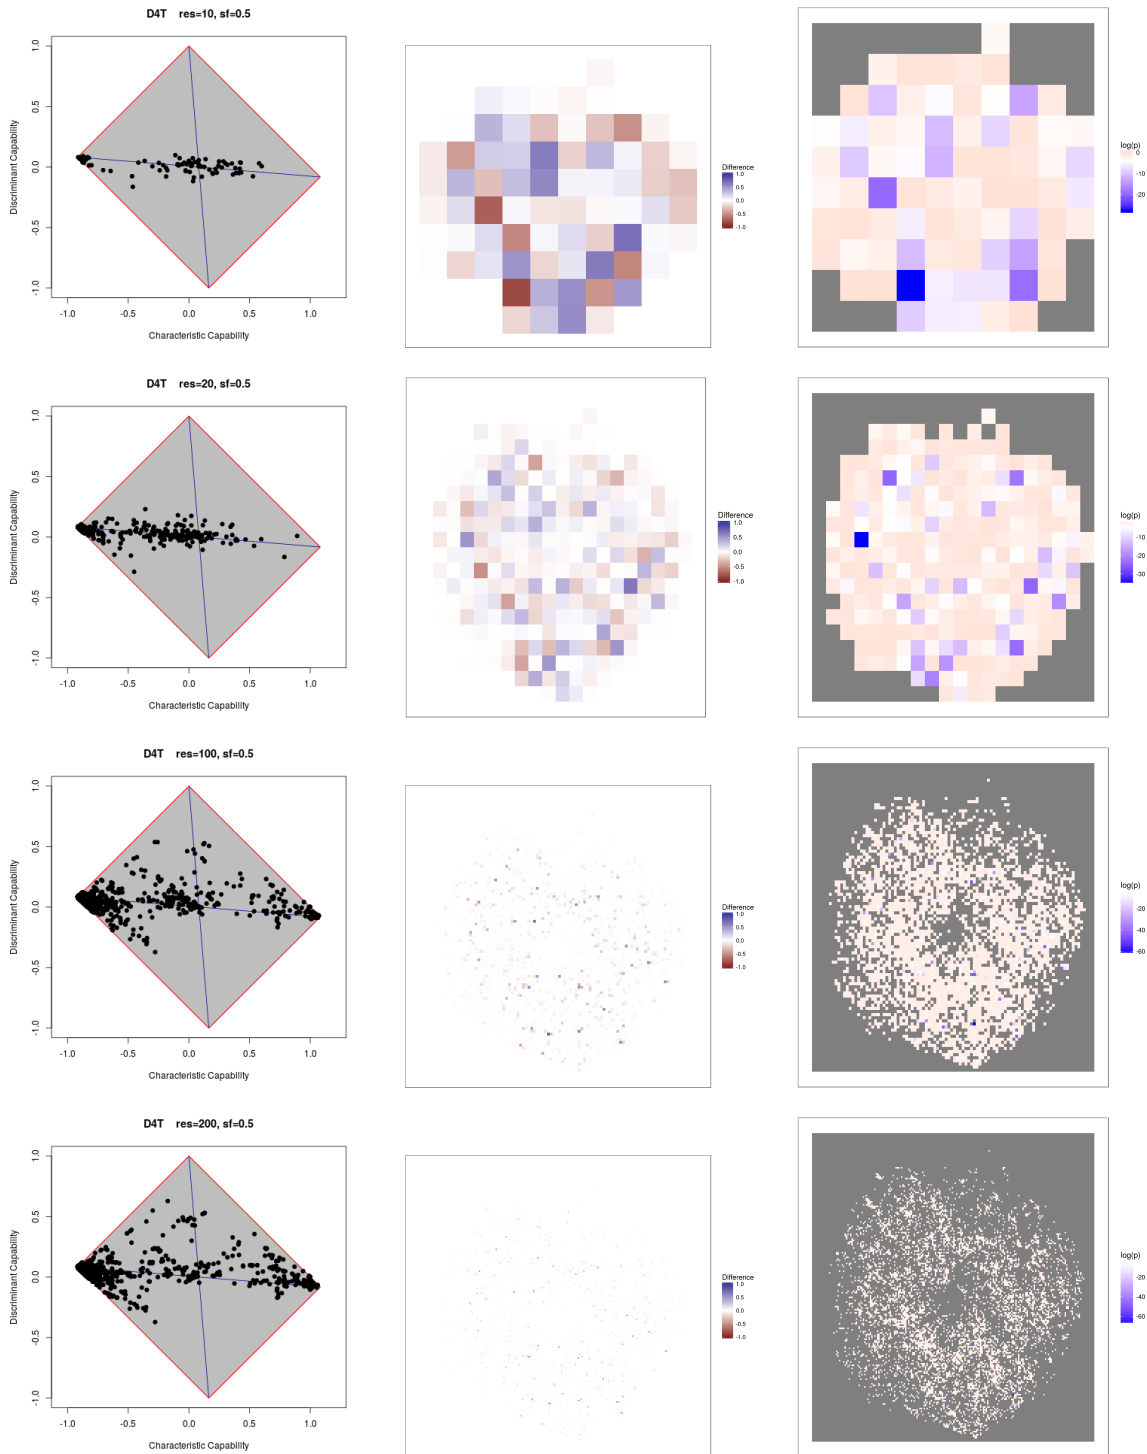

Figure 14: D4T, sf=0.5

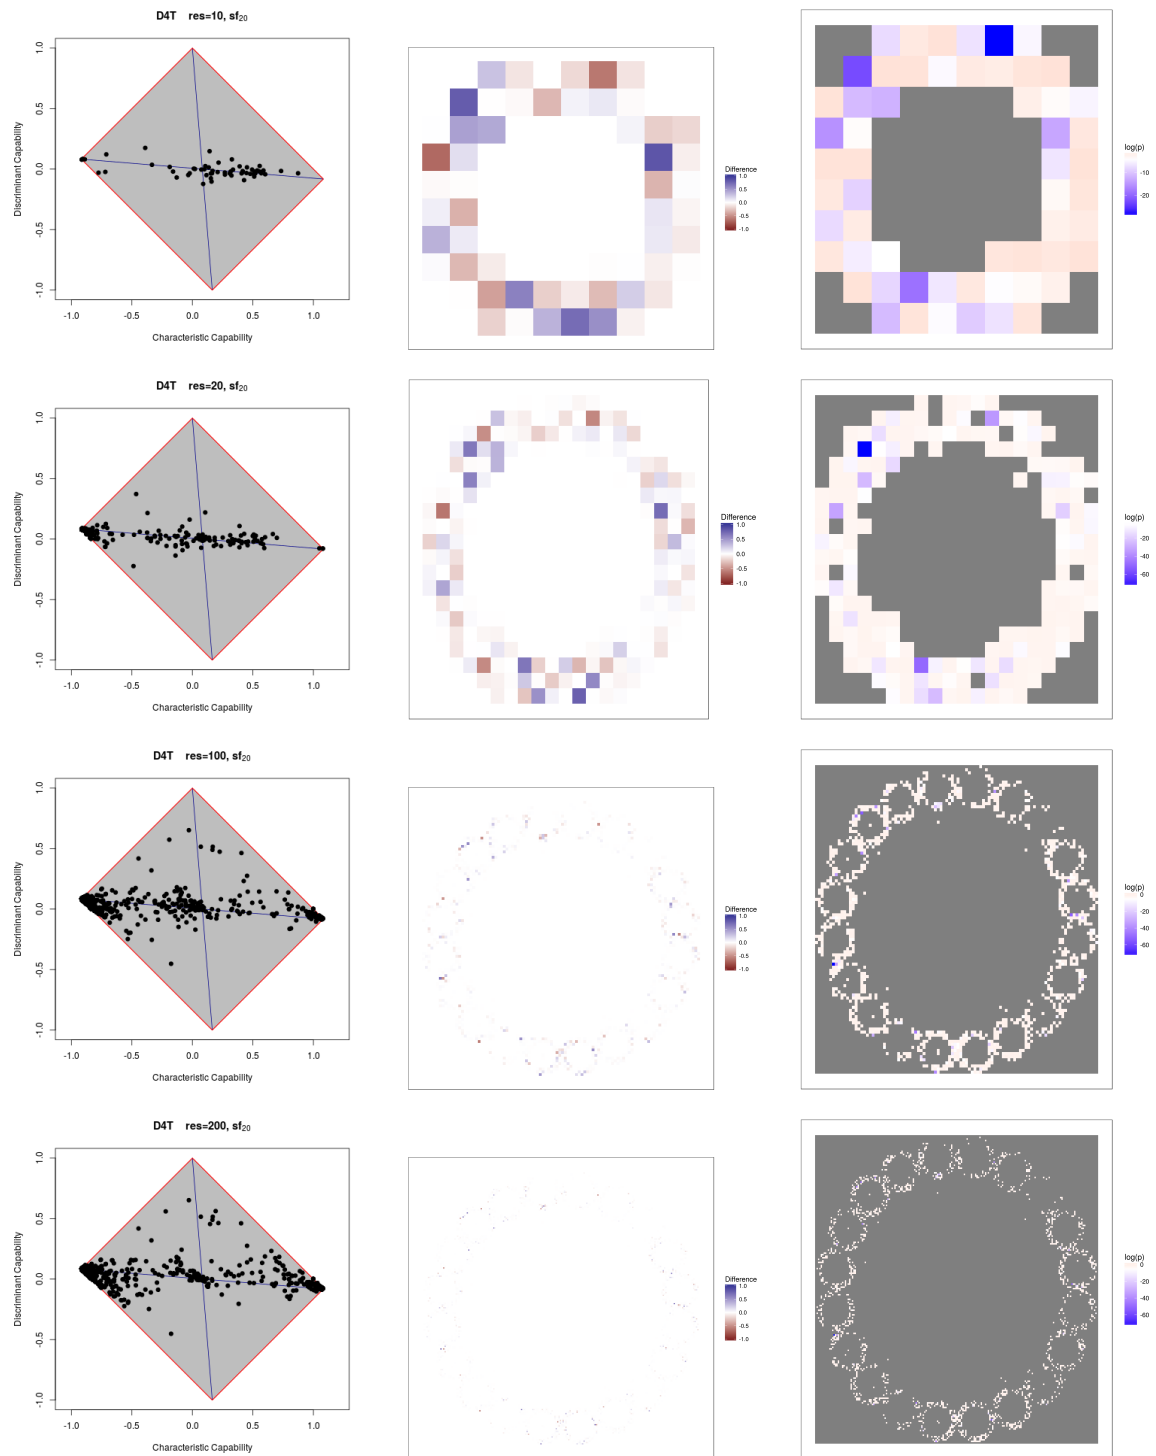

Figure 15: D4T,  $sf_{20}$



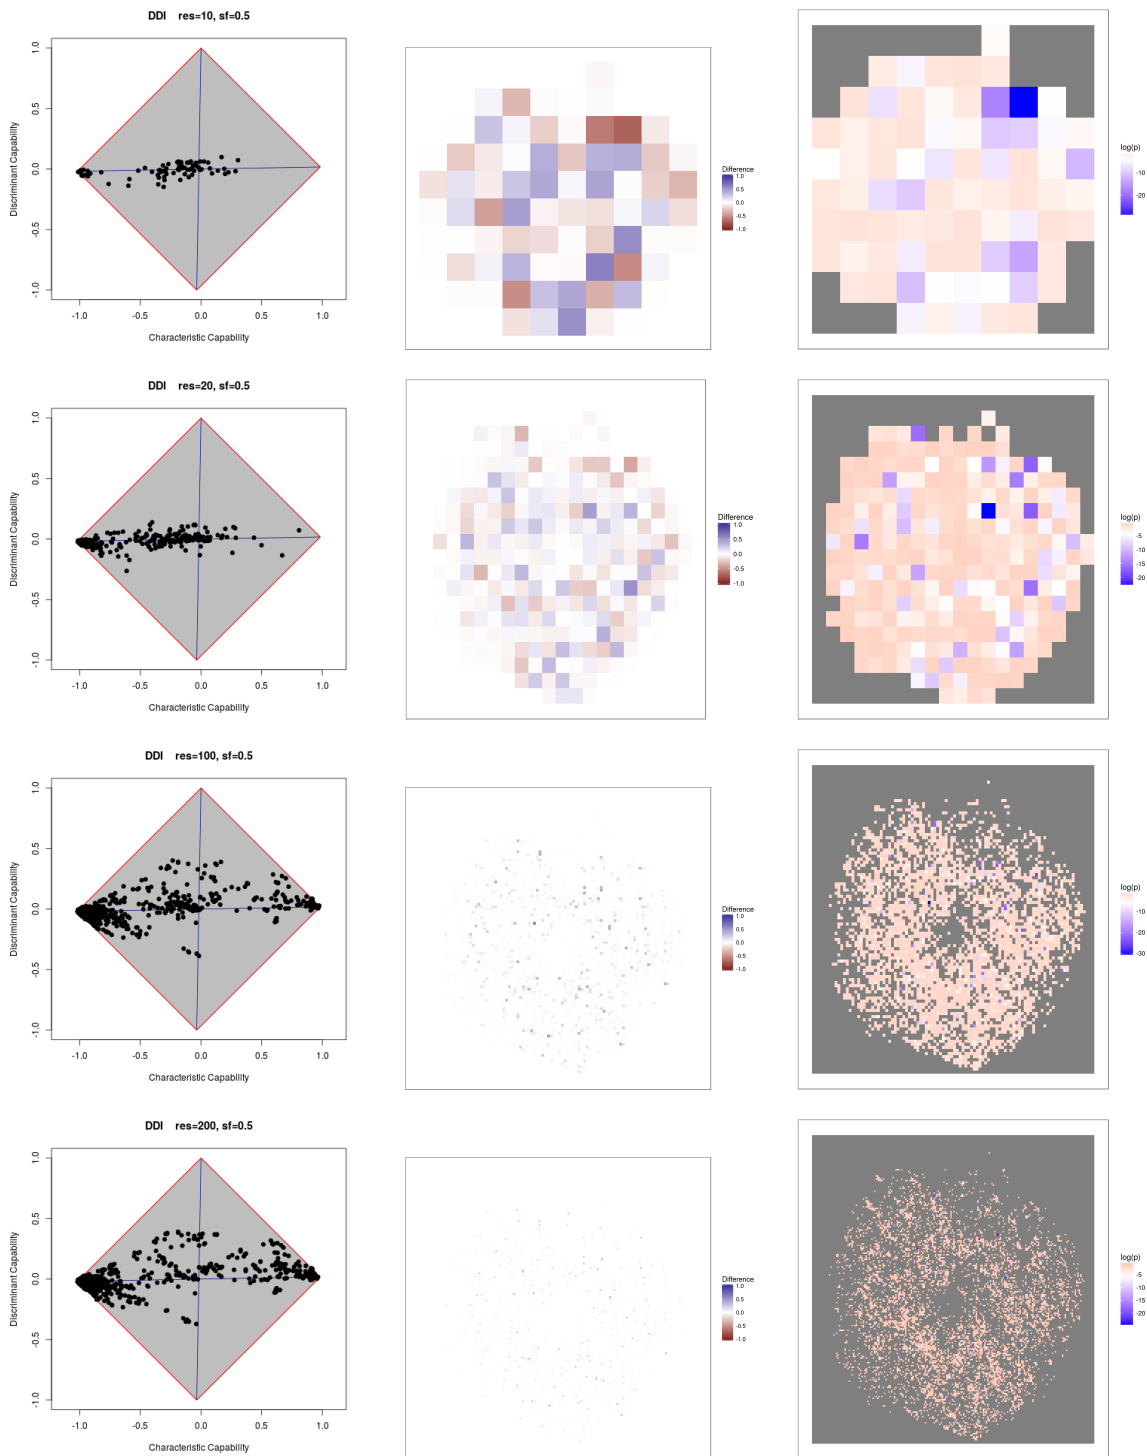

Figure 16: DDI, sf=0.5

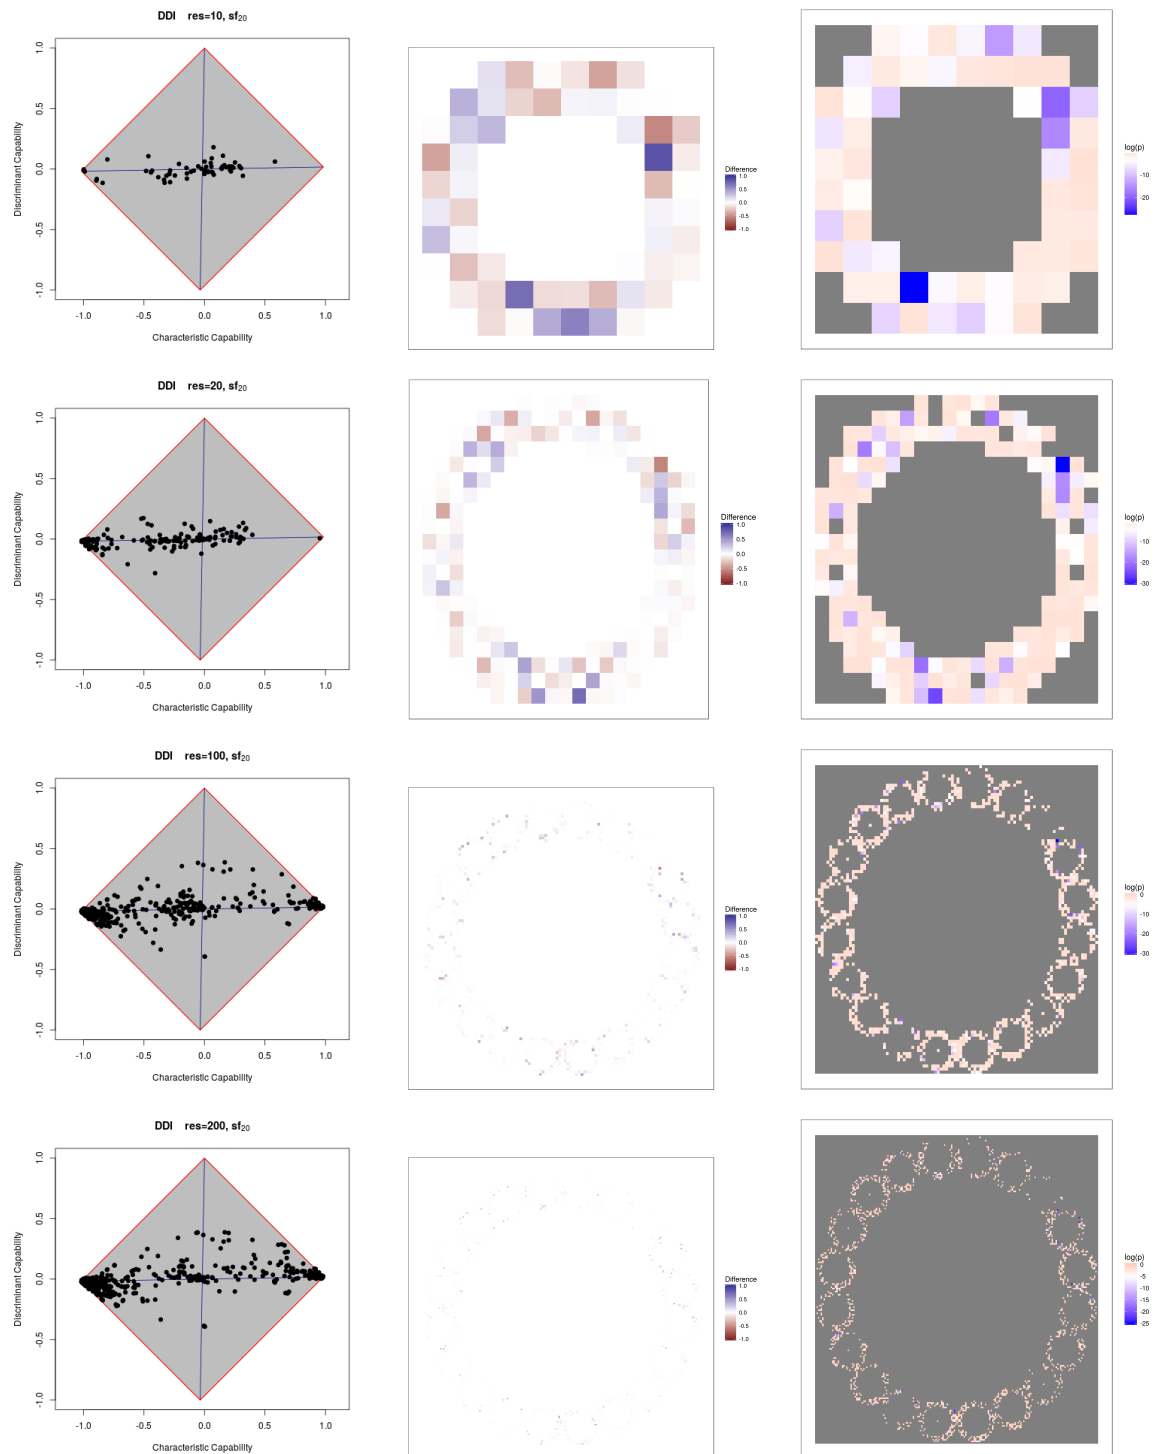

Figure 17: DDI,  $sf_{20}$

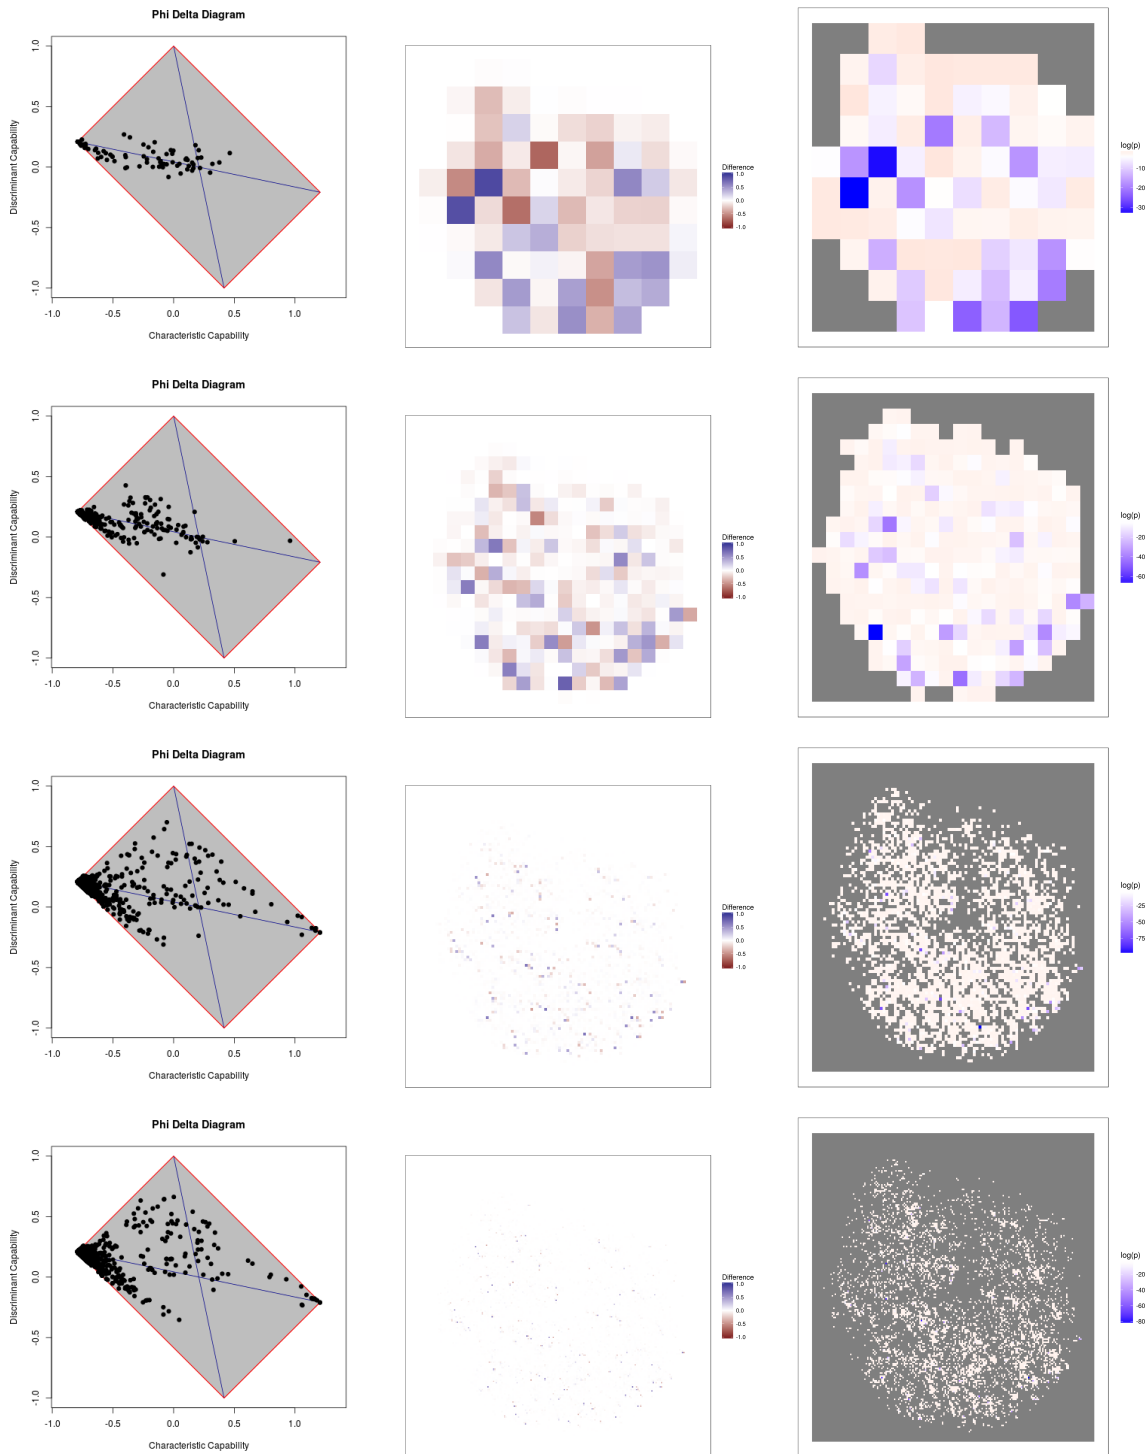

Figure 18: APV,  $sf=0.5$

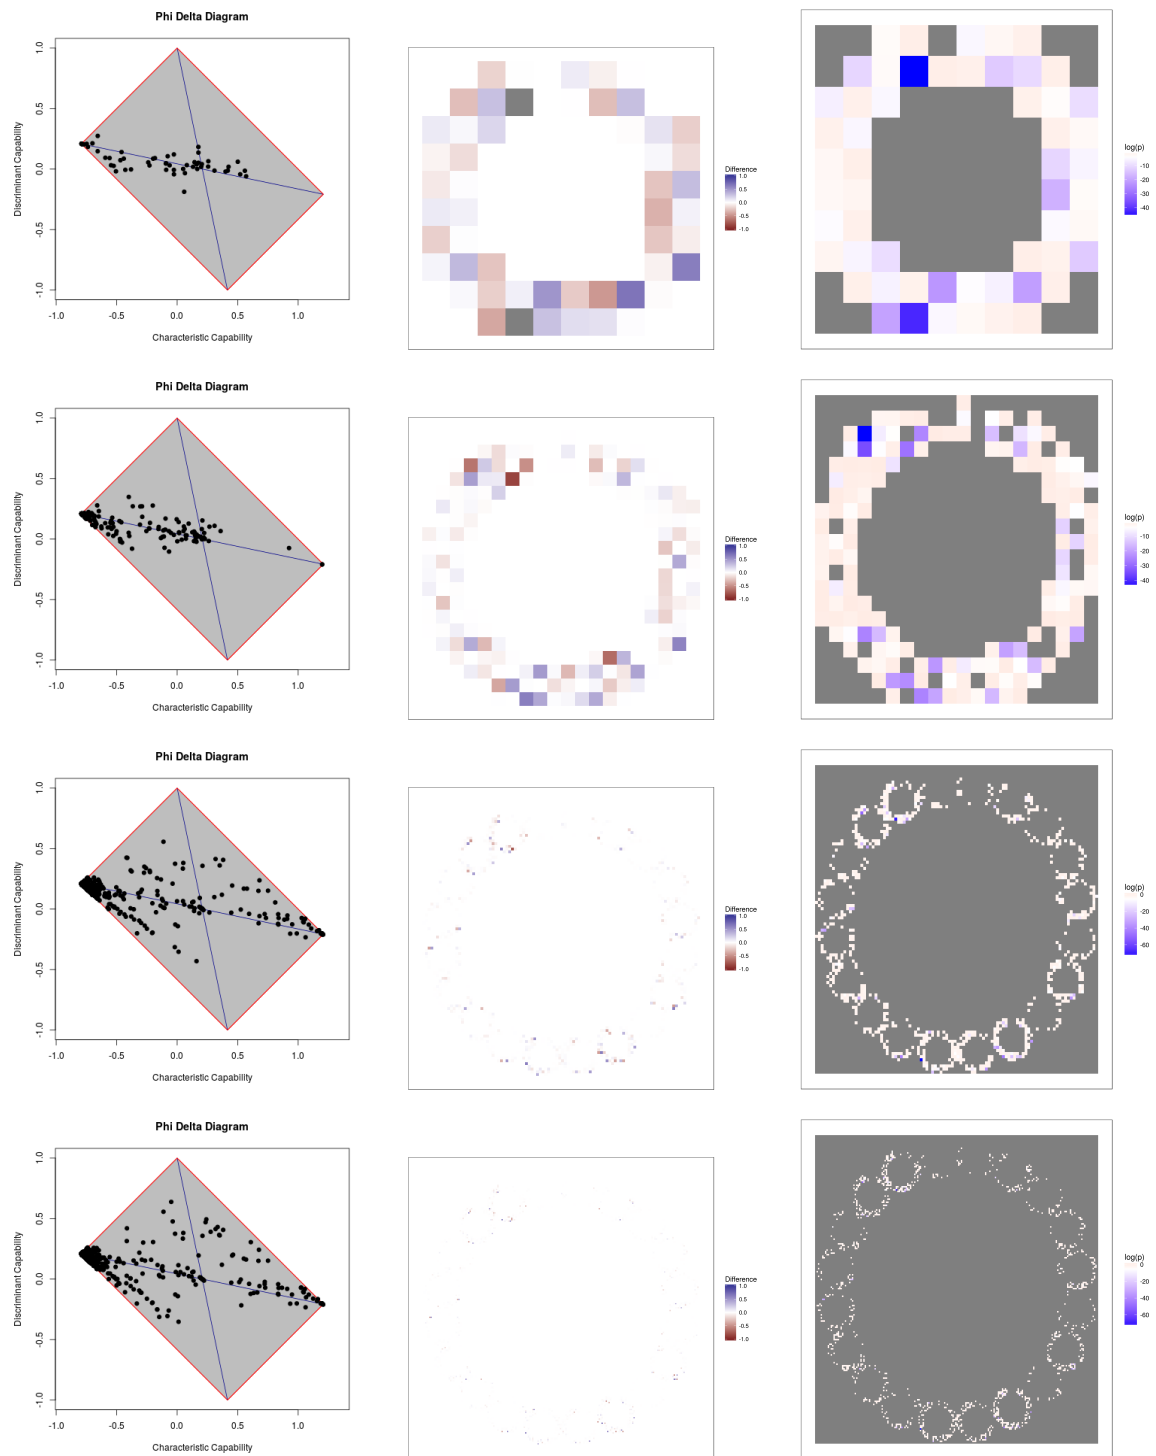

Figure 19: APV,  $sf_{20}$

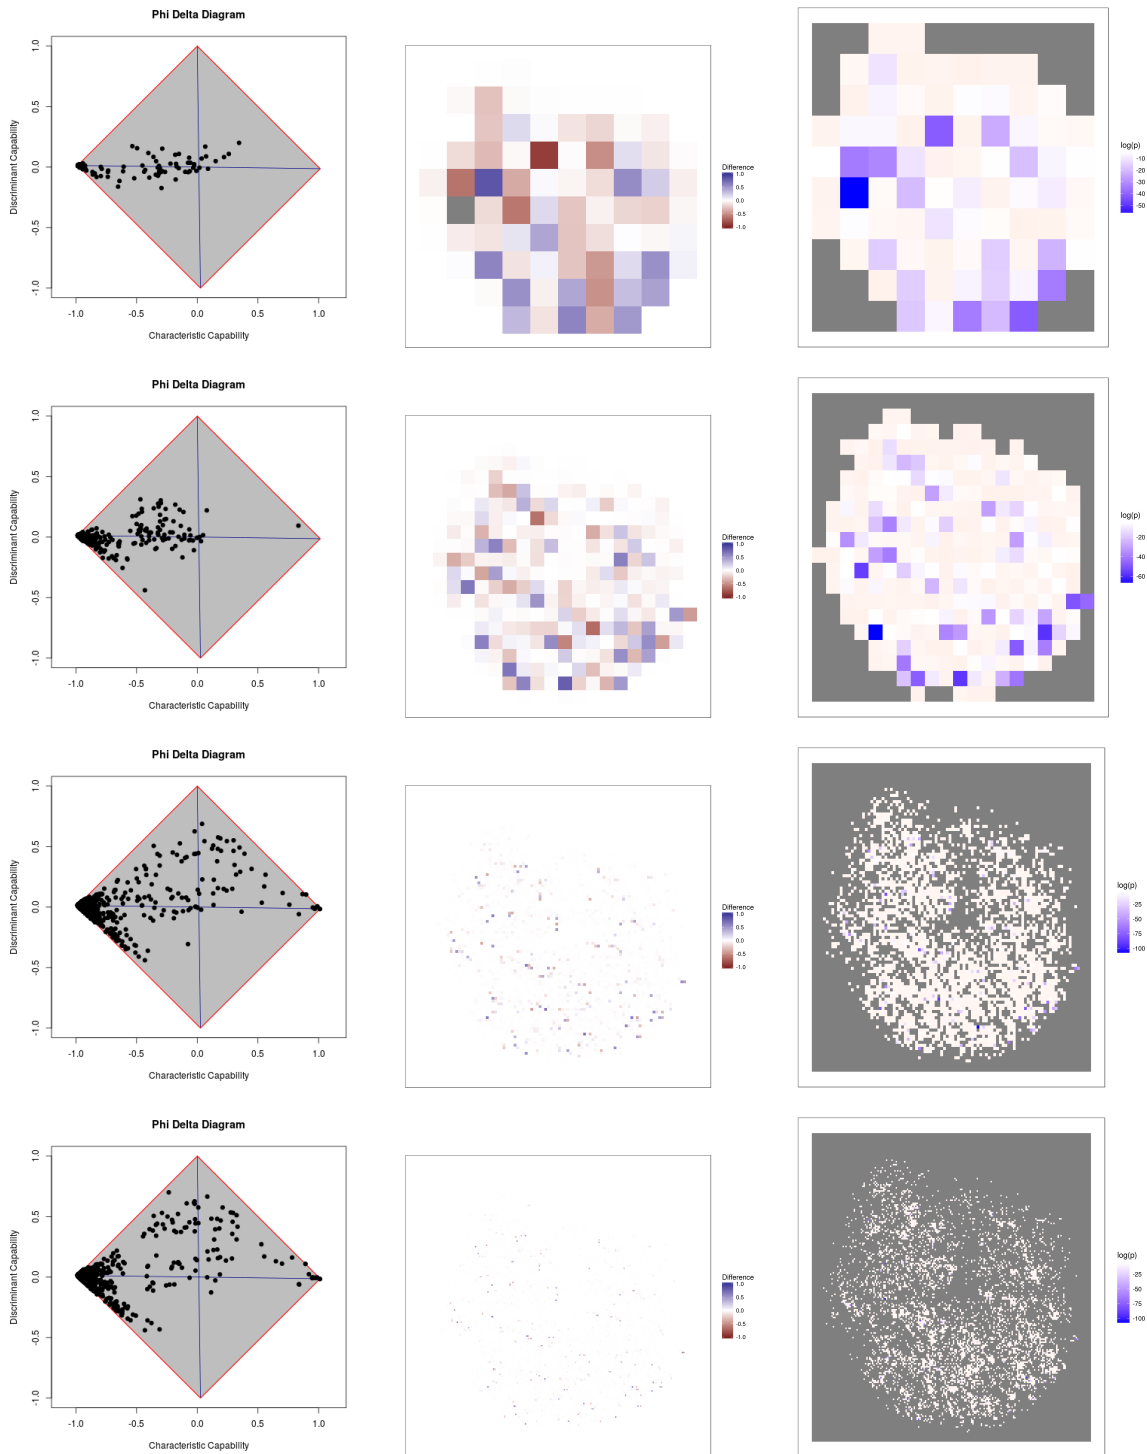

Figure 20: IDV,  $sf=0.5$

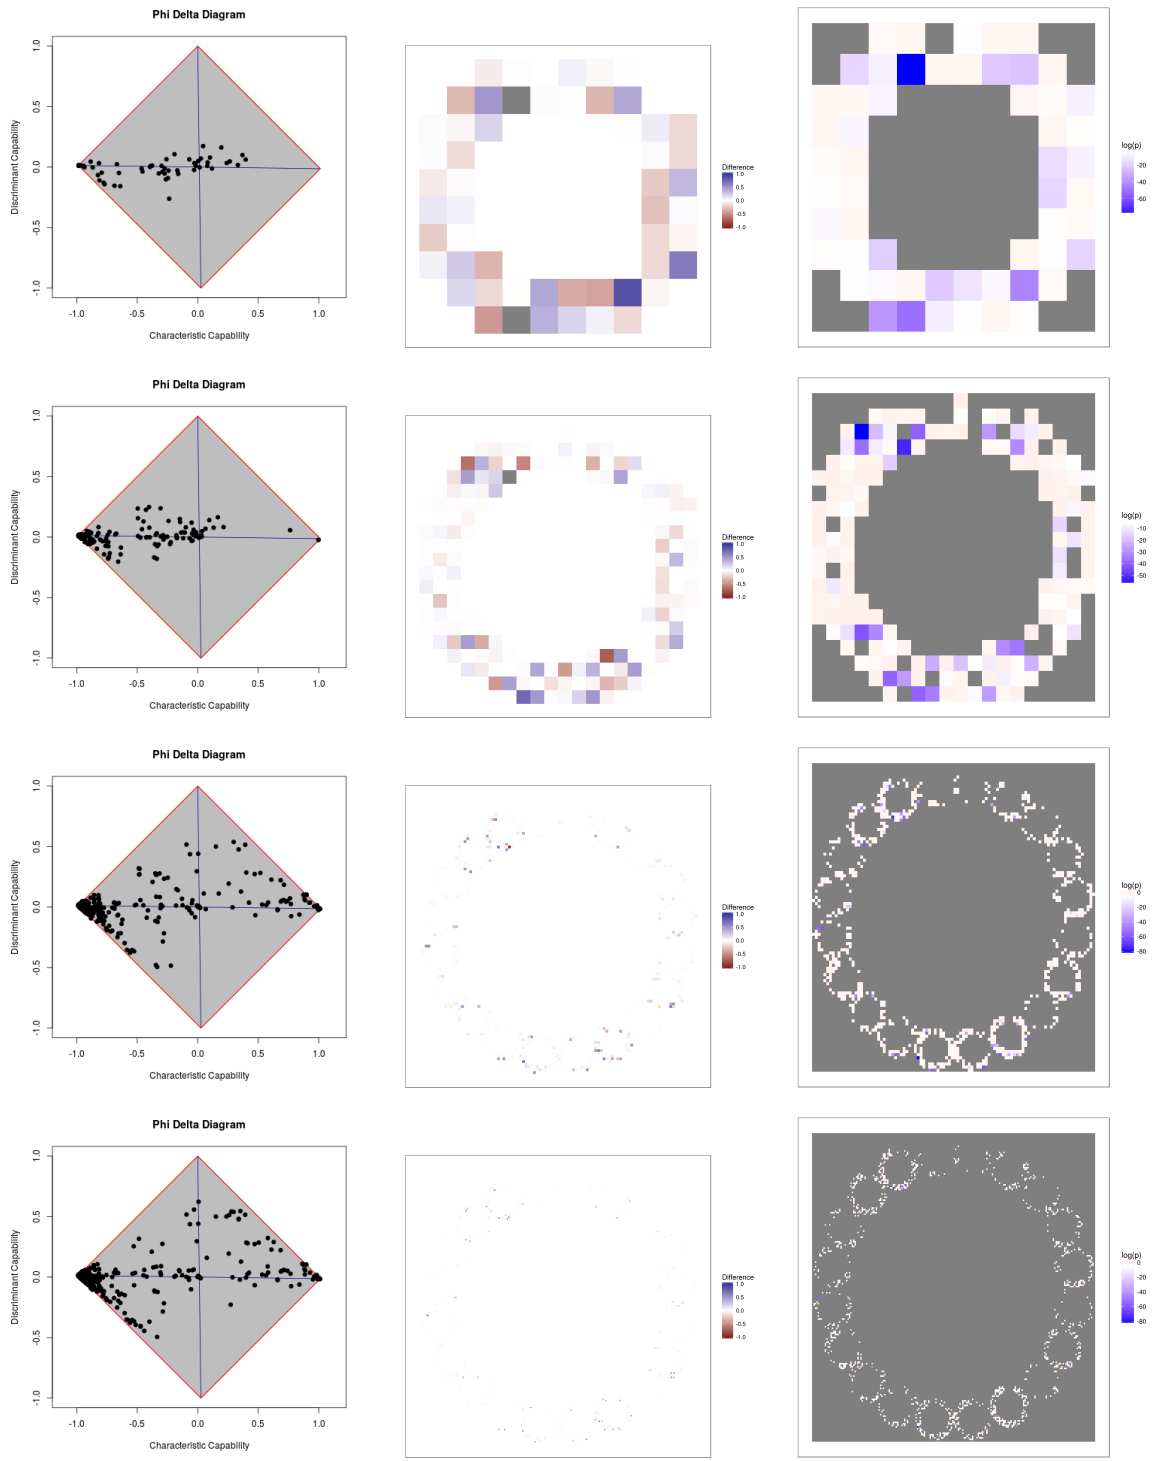

Figure 21: IDV,  $sf_{20}$

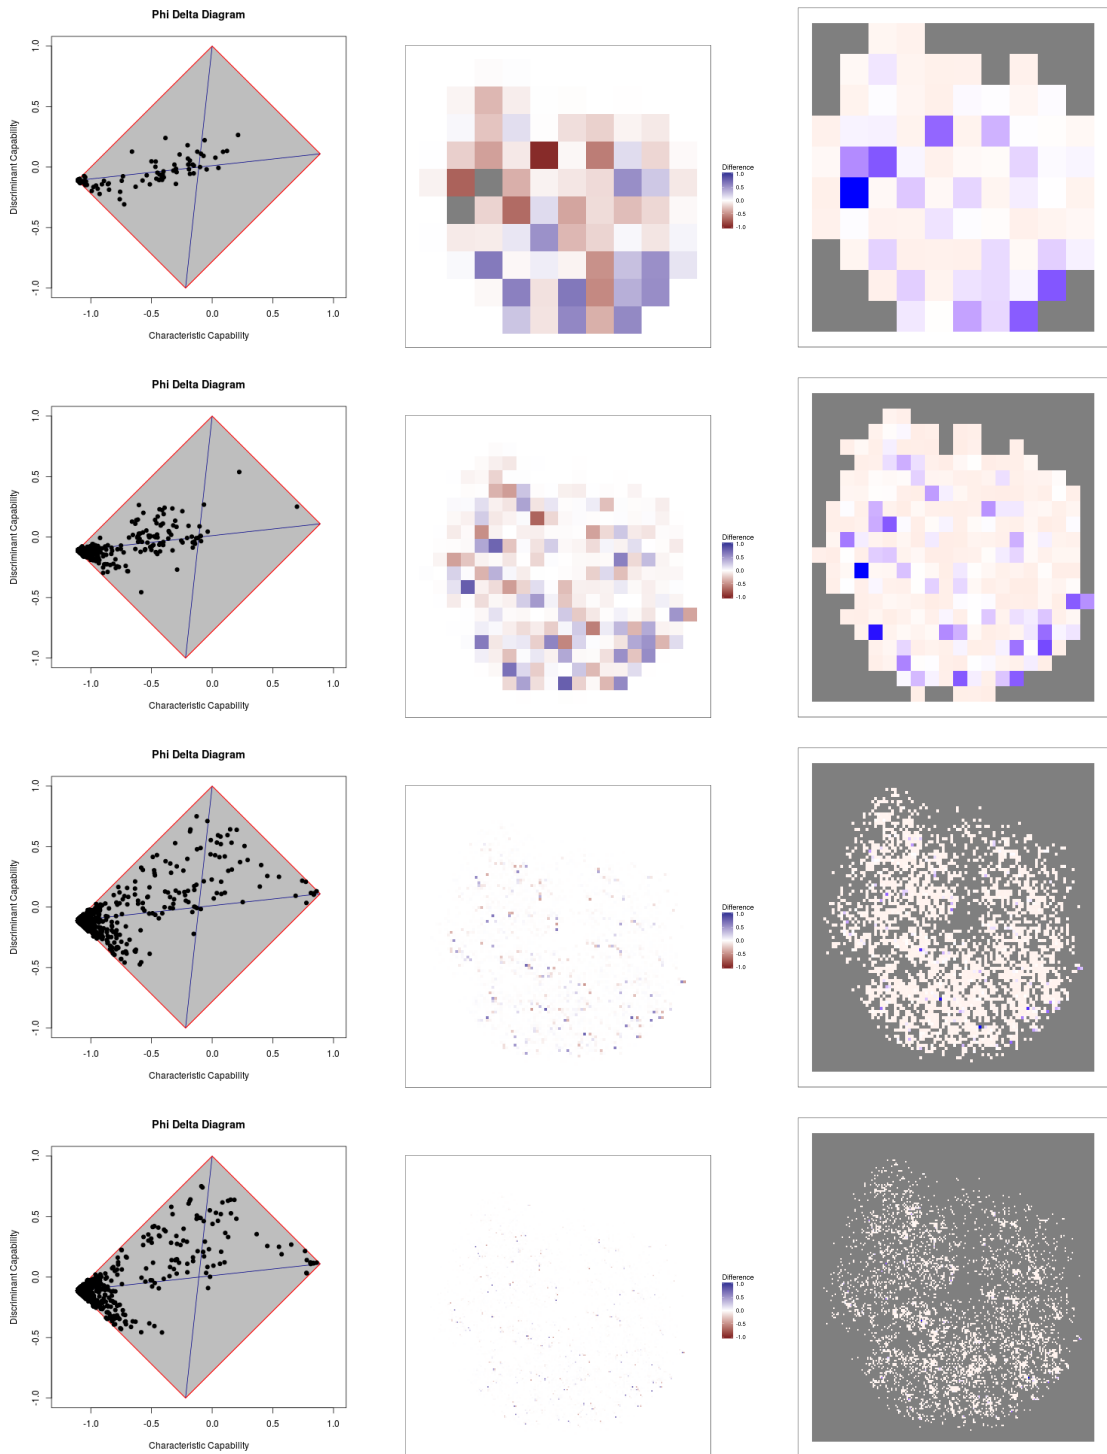

Figure 22: LPV,  $sf=0.5$

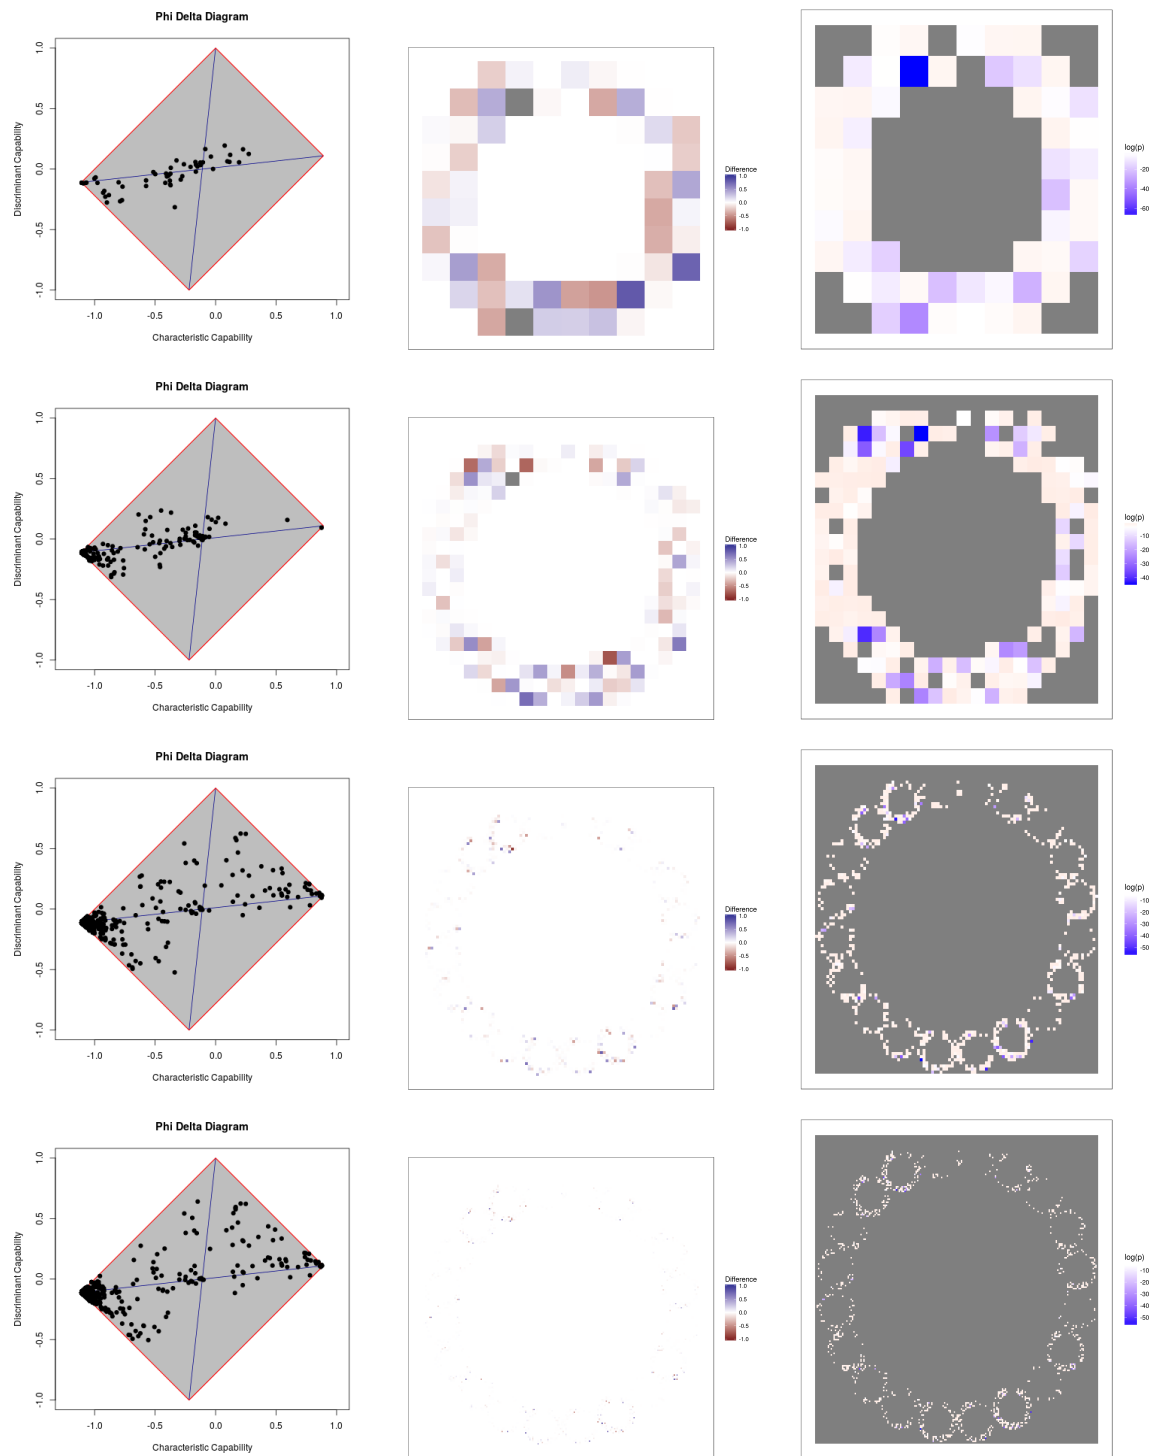

Figure 23: LPV,  $sf_{20}$



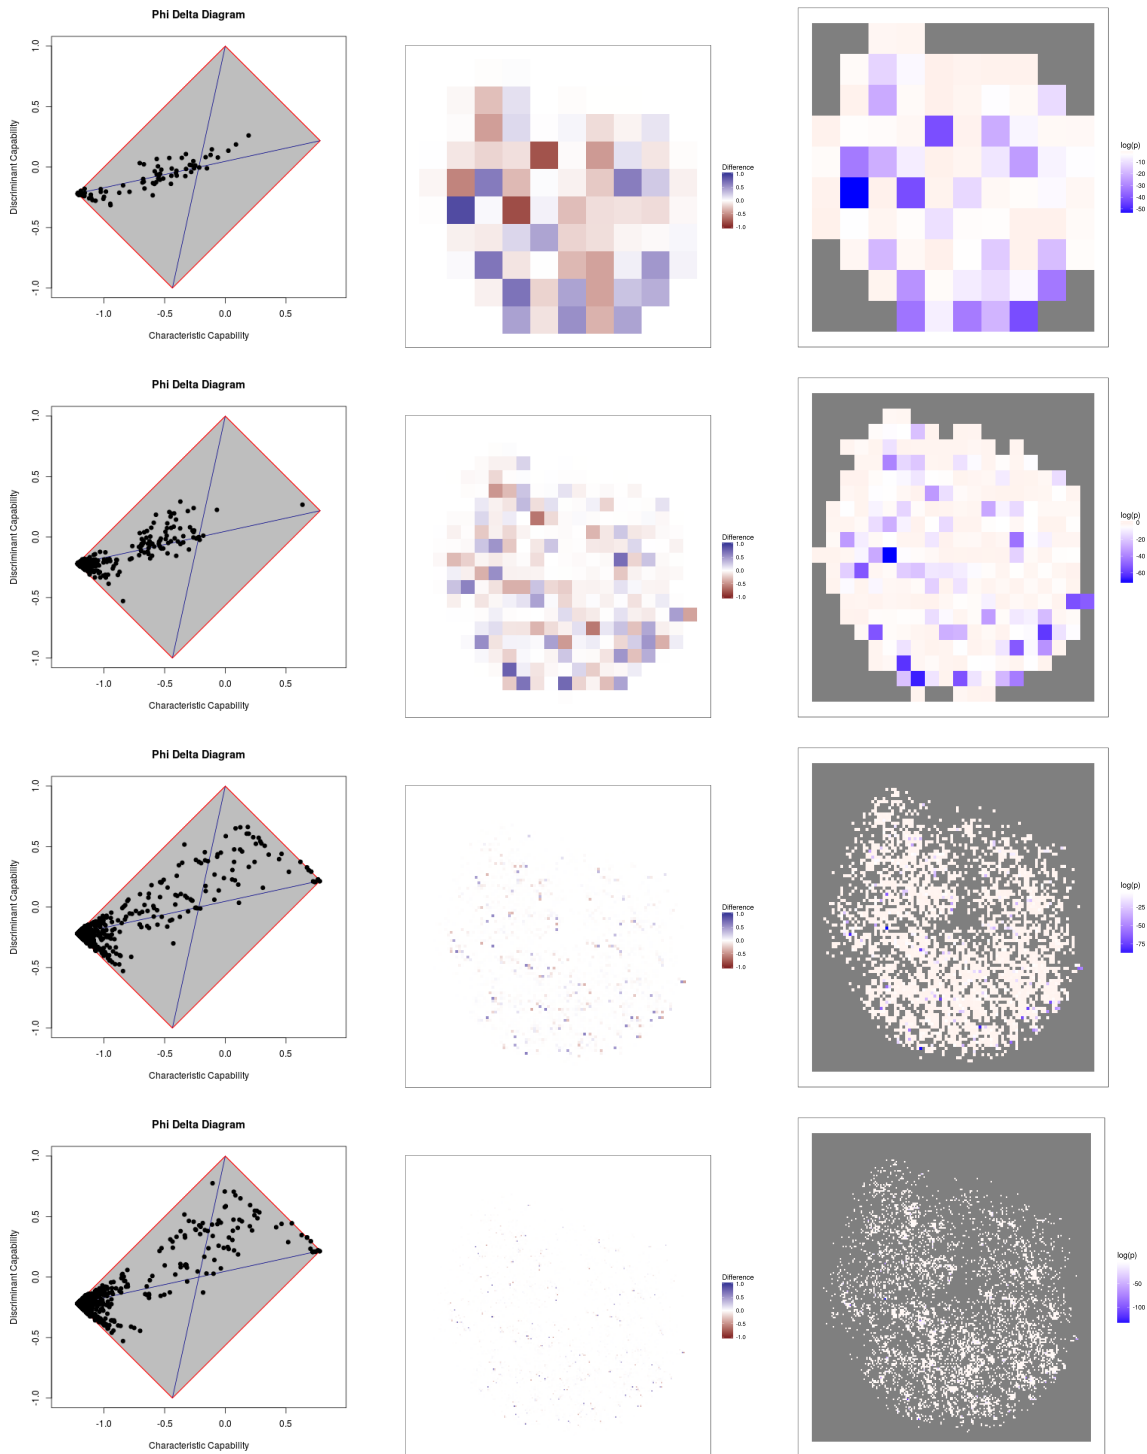

Figure 24: NFV,  $sf=0.5$

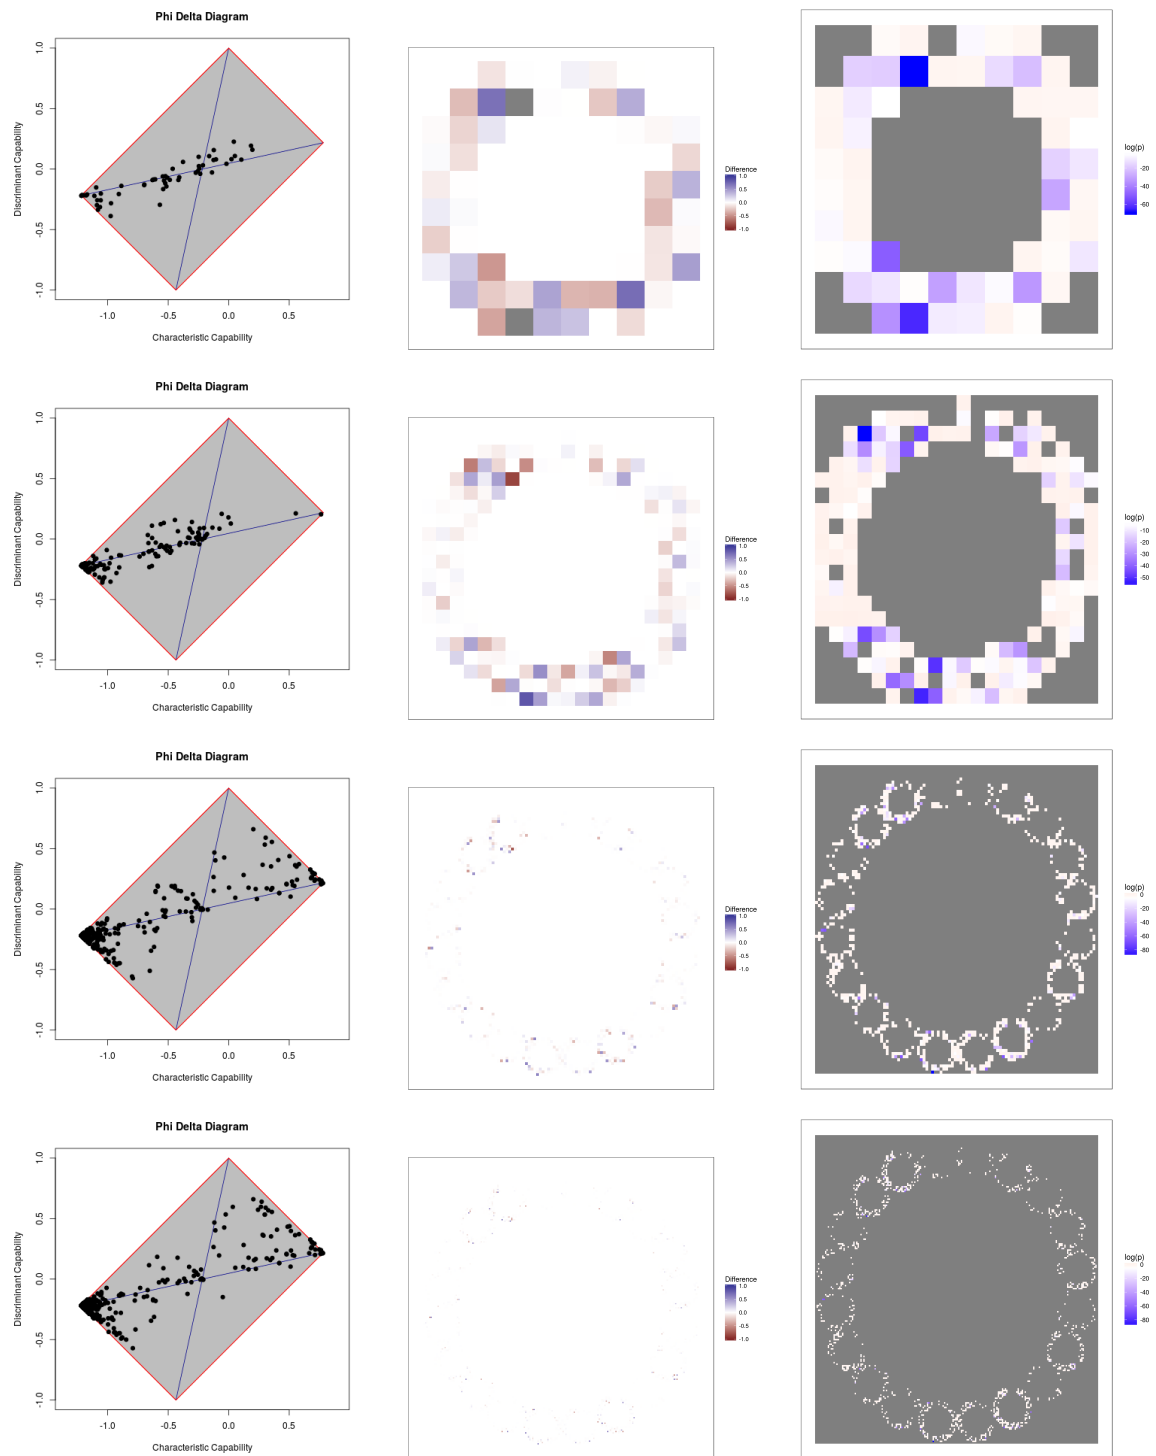

Figure 25: NFV,  $sf_{20}$

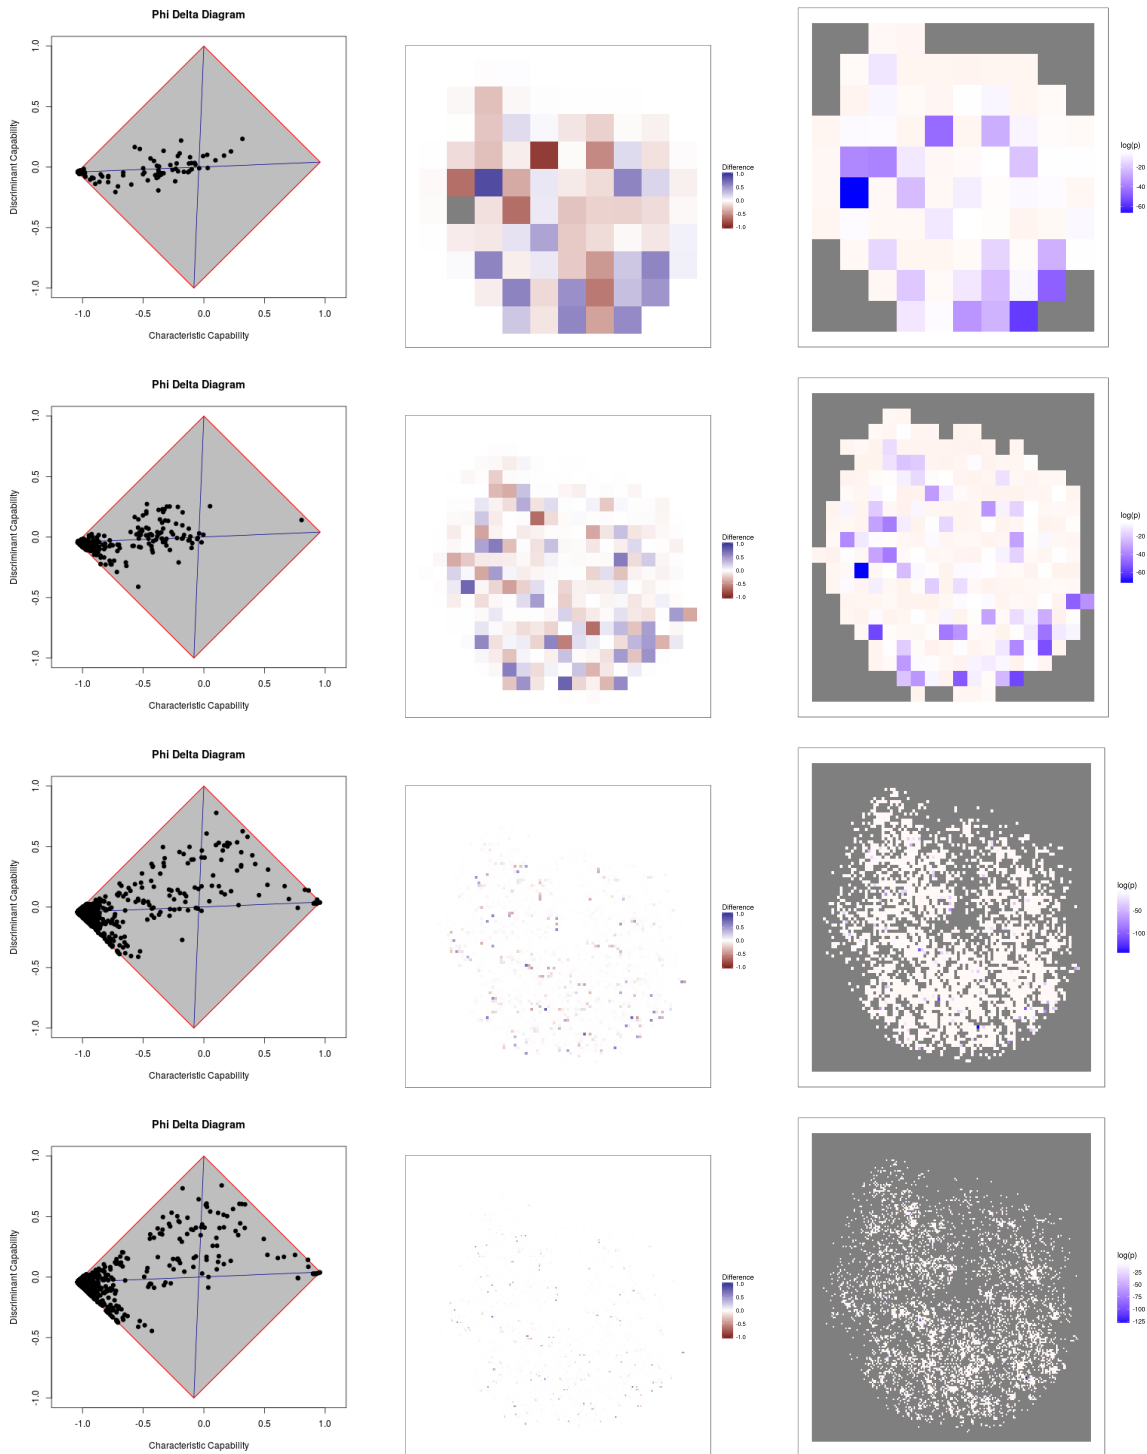

Figure 26: RTV,  $sf=0.5$

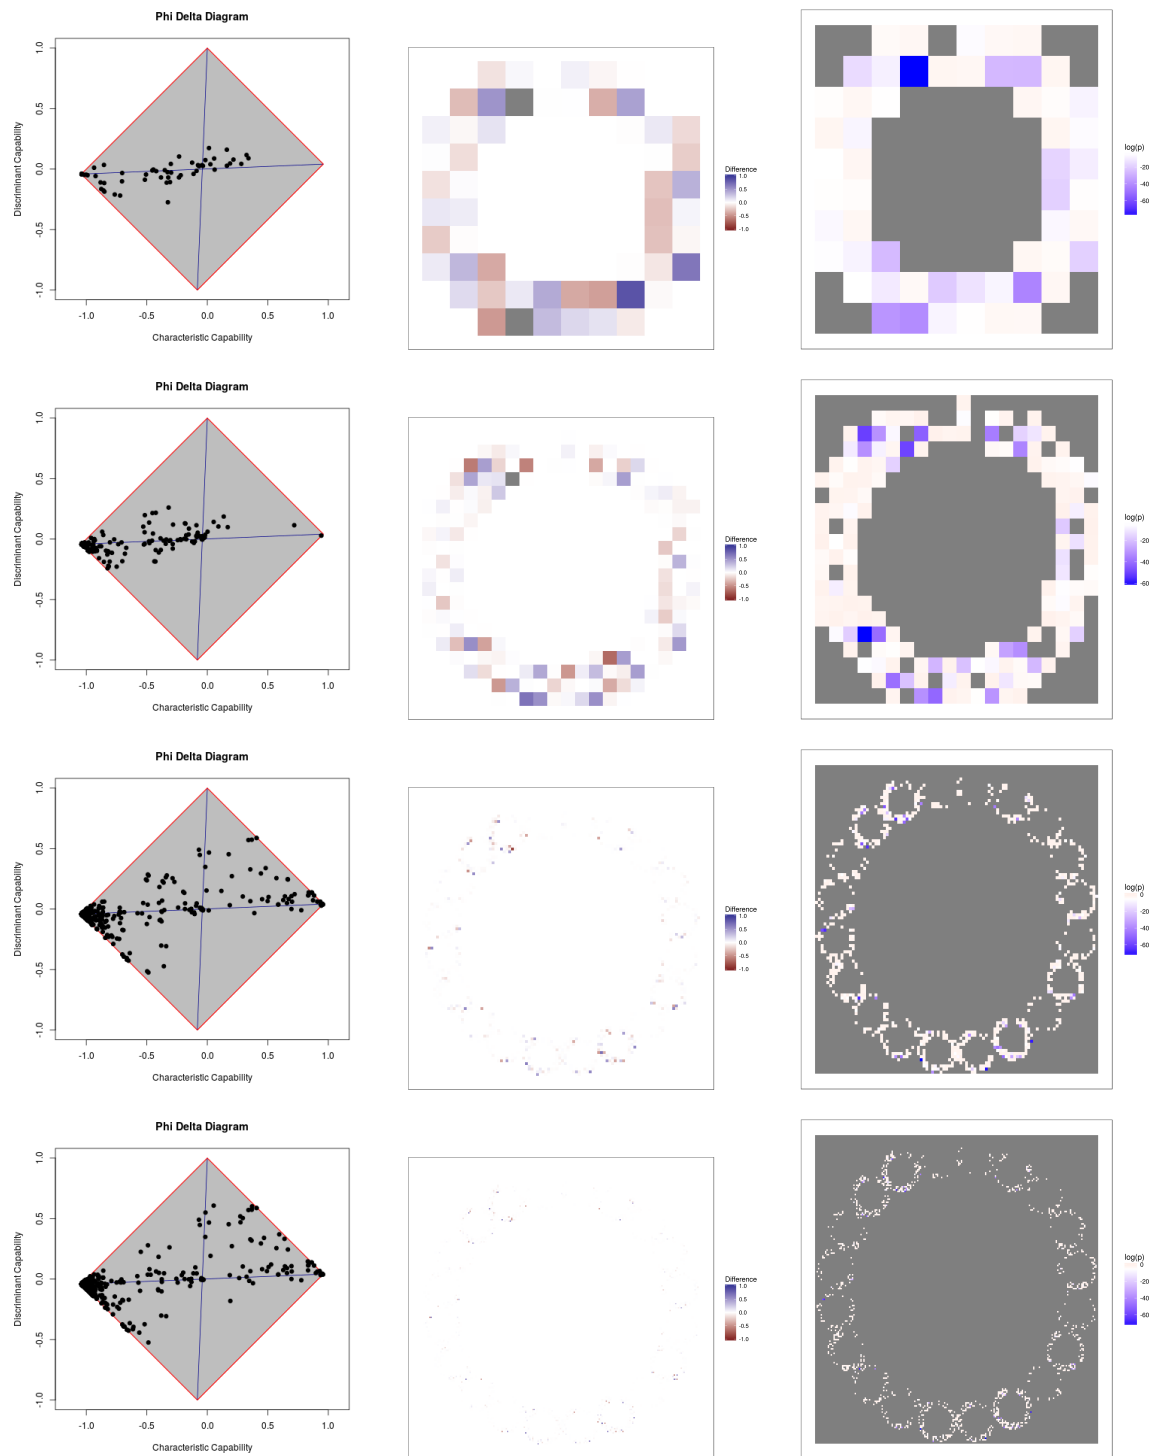

Figure 27: RTV,  $sf_{20}$

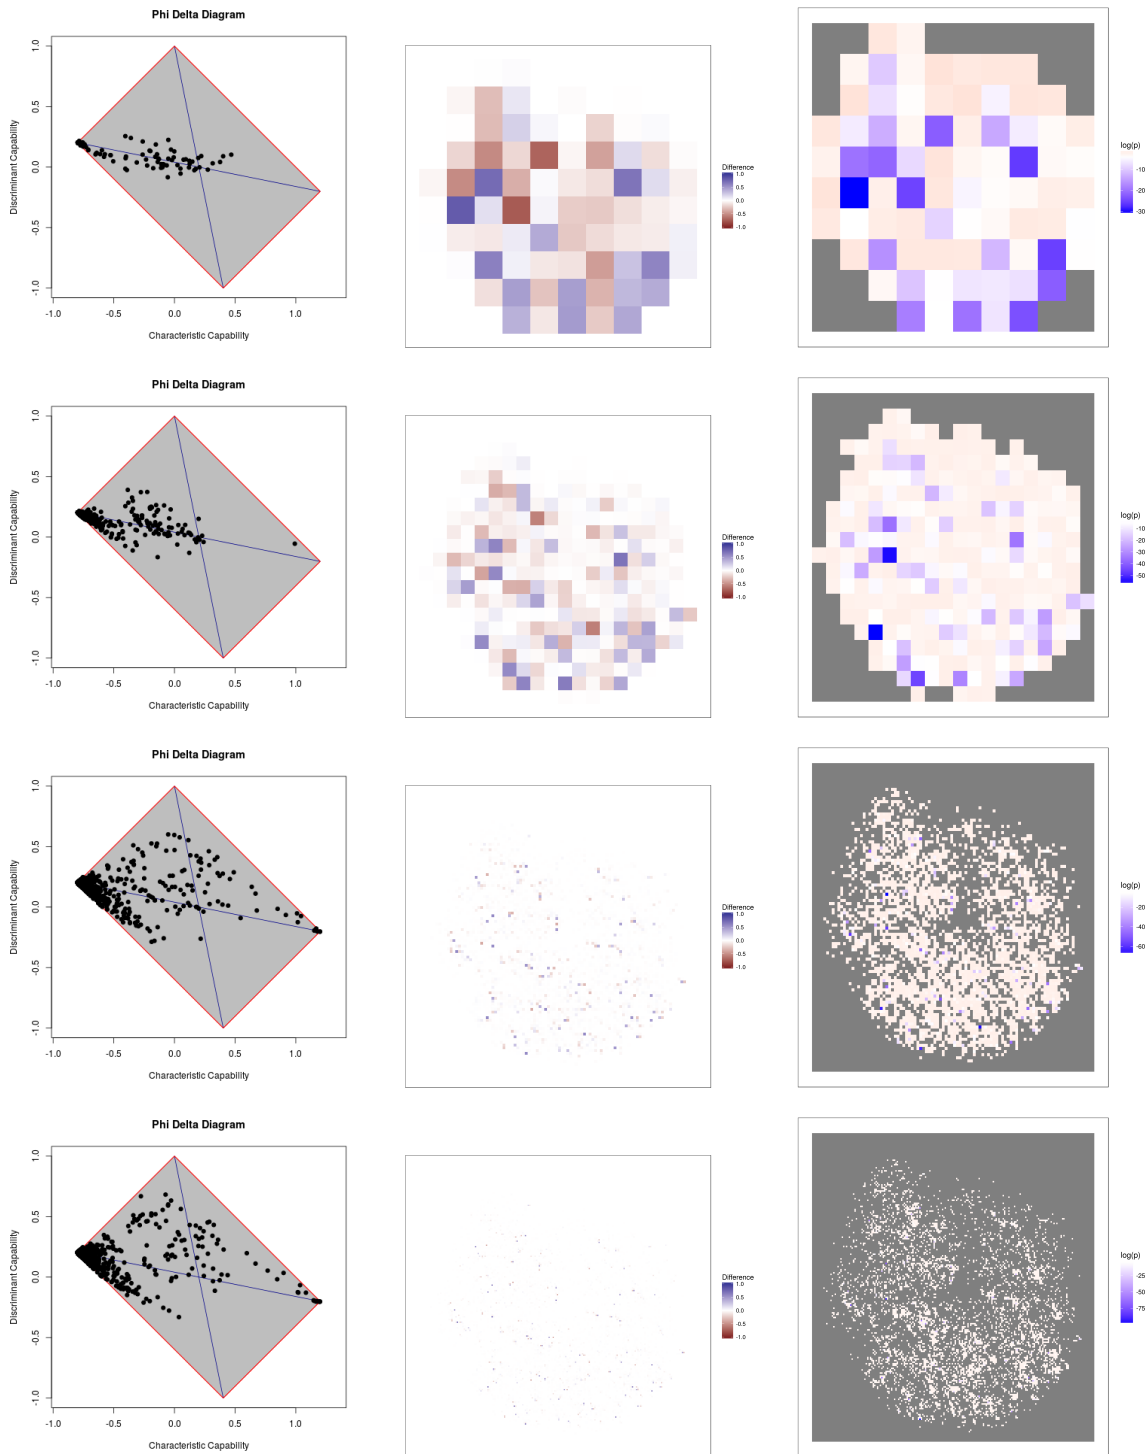

Figure 28: SQV,  $sf=0.5$

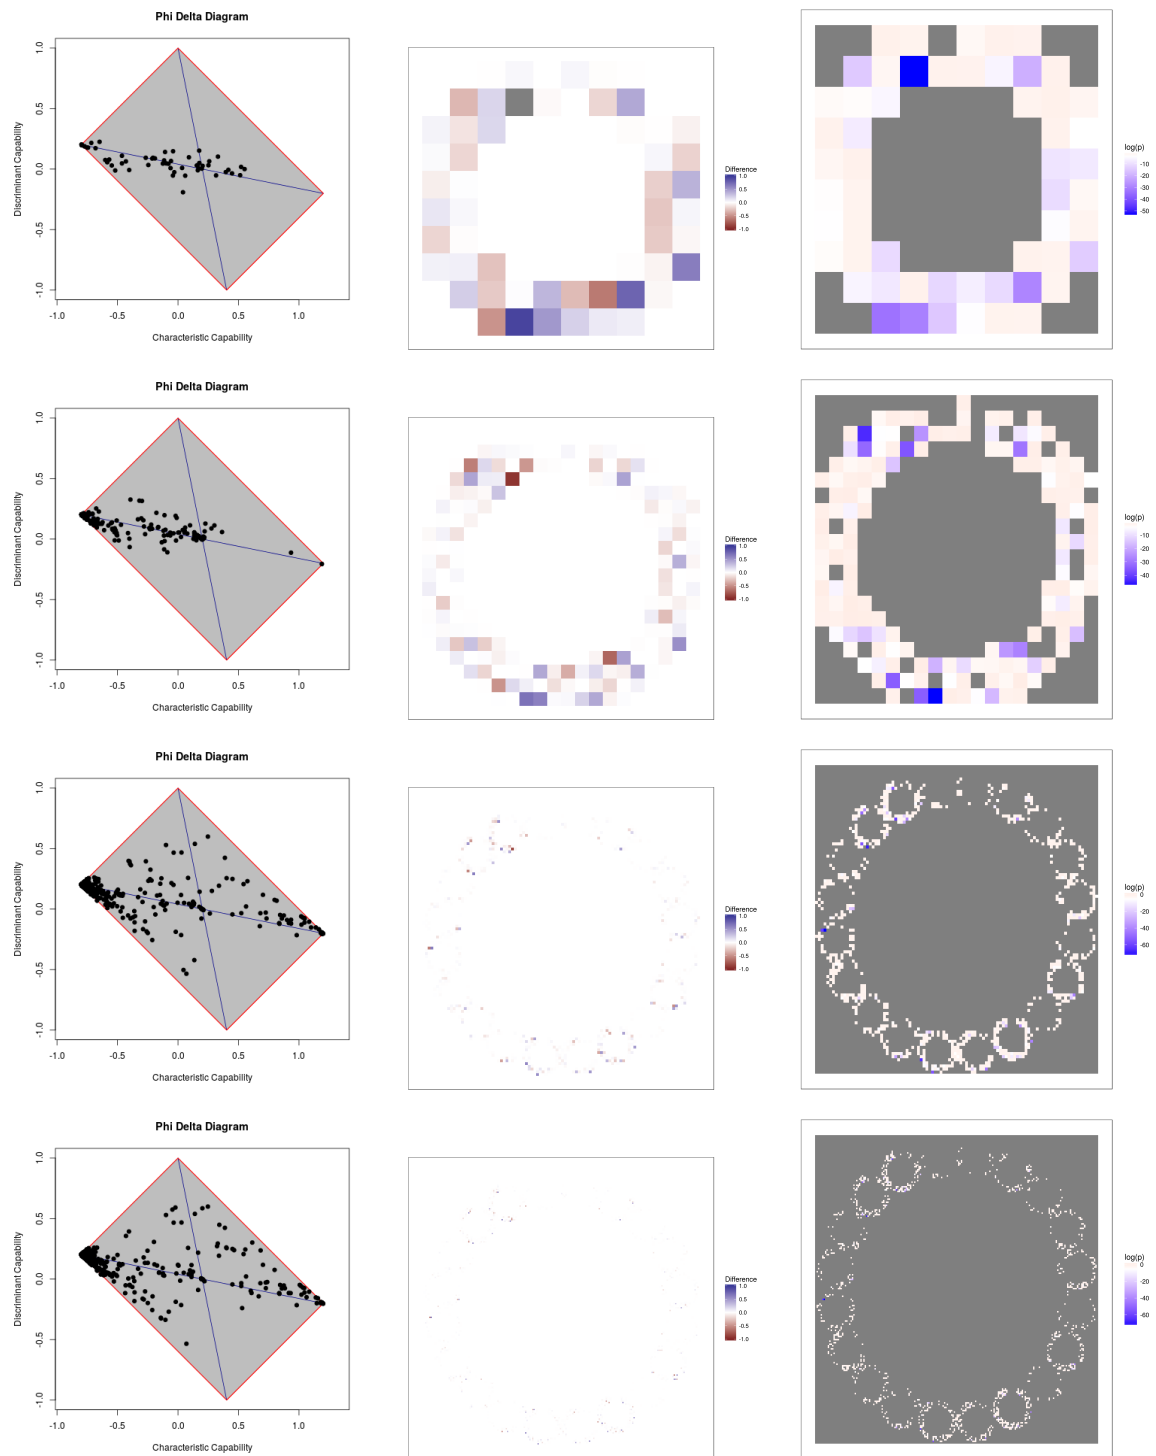

Figure 29: SQV,  $sf_{20}$
